# Supplementary material for: A Rapid CRISPR/Cas-based Mutagenesis Assay in Zebrafish for Identification of Genes Involved in Thyroid Morphogenesis and Function
Source: PubMed Central journal article supplement (PMC5884836; doi:10.1038/s41598-018-24036-4), 2018-04-04
Supplement: 41598_2018_24036_MOESM1_ESM.pdf [file 41598_2018_24036_MOESM1_ESM.pdf]

## Supplementary Information 1: Sup Tables 1-2 and Sup Fig 1-10

### **A Rapid CRISPR/Cas-based Mutagenesis Assay in Zebrafish for Identification of Genes Involved in Thyroid Morphogenesis and Function**

Trubiroha, A.<sup>1,a</sup>, Gillotay, P.<sup>1</sup>, Giusti, N.<sup>1</sup>, Gacquer, D.<sup>1</sup>, Libert, F.<sup>1</sup>, Lefort, A.<sup>1</sup>, Haerlingen, B.<sup>1</sup>, De Deken, X.<sup>1</sup>, Opitz, R.<sup>1,2</sup> and Costagliola, S.<sup>1</sup>

<sup>1</sup> Institute of Interdisciplinary Research in Molecular Human Biology (IRIBHM), Université Libre de Bruxelles, Route de Lennik 808, 1070 Brussels, Belgium

<sup>2</sup> Institute of Experimental Pediatric Endocrinology, Charité Universitätsmedizin Berlin, Augustenburger Platz 1, 13353 Berlin, Germany

A. Trubiroha, P. Gillotay and N. Giusti contributed equally to this work

<sup>a</sup> present address: German Federal Institute for Risk Assessment (BfR), Department Chemicals and Product Safety, Max-Dohrn-Strasse 8-10, 10589 Berlin, Germany

Corresponding authors:

Sabine Costagliola ([scostag@ulb.ac.be](mailto:scostag@ulb.ac.be))

Robert Opitz ([robert.opitz@charite.de](mailto:robert.opitz@charite.de))

This file contains 2 Tables, 10 Figures and Supplementary NGS data

Supplementary Table 1. gRNA target sequences and primers used for genotyping

Supplementary Table 2. Primers used for PCR-based approach of RNA probe preparation

Supplementary Figure 1. Quantification of fluorescence signal intensity in live transgenic *Tg(tg:nlsEGFP)* zebrafish larvae at 6 dpf.

Supplementary Figure 2. Phenotypic spectrum of *pax2a* and *nkx2.4b* crispants

Supplementary Figure 3. Thyroid anlage specification is not perturbed in *pax2a* crispants

Supplementary Figure 4. Phenotypic spectrum of *duox* and *duoxa* crispants

Supplementary Figure 5. Phenotypic spectrum of *tshr* crispants

Supplementary Figure 6. Illumina HiSeq analyses of *nkx2.4b*, *duoxa* and *tshr* crispants

Supplementary Figure 7: Full length gel for the cropped gel shown in Figure 7.

Supplementary Figure 8. Characterization of *adamtsl2* crispants

Supplementary Figure 9. Full length gels for the cropped gels shown in Suppl. Figure 8

Supplementary Figure 10. Brightfield micrographs of crispants and germline mutant fish

Supplementary NGS data. Allele frequencies of individual F0 crispants as determined from HiSeq sequencing data by CrispRVariants Software

## Supplementary Tables 1 – 2

**Supplementary Table 1:** gRNA target sequences and primers used for genotyping

| target                  | gRNA target sequence (5'-3') | strand | forward primer (5'-3') | reverse primer (5'-3')   | product size |
|-------------------------|------------------------------|--------|------------------------|--------------------------|--------------|
| <i>adamtsl2</i> exon 1  | GGCTGGAAGTGATCACATAC         | +      | GCTTCAGACAGTGTCTCTCCTG | GCTTCAGACAGTGTCTCTCCTG   | 206 bp       |
| <i>adamtsl2</i> exon 13 | AGAGGTCAGATGCTCAGATG         | +      | CAGCTAAATGTGGTCGCAAG   | GGTCCCCTCGGATGCT         | 151 bp       |
| <i>duox</i> exon 23     | GTCATCTACGCCATCTCCGC         | +      | ACCGGAGTCAATTTCCCTTG   | ACTTACAGATGCATCTTTCC     | 210 bp       |
| <i>duoxa</i> exon 2     | GTATTCGGGTAGAATGAAG          | +      | GCTTTAGTTCTCGCTGTGG    | TCACCGATCTGCCACGTATT     | 178 bp       |
| <i>nkx2.4b</i> exon 1   | GTTCGAGCCGTACCAAGCCG         | -      | GAGCCATAACGCGTACCACA   | GTATCTCGGCTCCGGGTTTC     | 169 bp       |
| <i>nkx2.4b</i> exon 2   | AGCAGCGCCGTTTCCTGCG          | -      | AAAGTCTCCAGGTTTATGGG   | CGCTCCAGCTCGTATACCT      | 152 bp       |
| <i>pax2a</i> exon 2     | GGCGGTGTGAACCAGCTAGG         | +      | TGTGTCTGTGTTGTGTATCCC  | TGGCTGACCCGTAGTTGTCT     | 167 bp       |
| <i>tshr</i> exon 4      | GCTGACATTCATCCACCCAG         | +      | GGAACACACGAAAGCTGACAT  | AACAGTGATTTTGTCTACAGATAC | 85 bp        |
| <i>tshr</i> exon 10     | GATCATAGGTGTCTCTGAAG         | -      | GAACCTGGCATCGACTTGAG   | GTTTCACCGAAACCCATGTT     | 128 bp       |

**Supplementary Table 2:** Primers used for PCR-based approach of RNA probe preparation

| target          | GenBank Accession | forward primer (5'-3')   | reverse primer (5'-3')    | probe size |
|-----------------|-------------------|--------------------------|---------------------------|------------|
| <i>adamtsl2</i> | XM_021476679      | AAGAAAACAACAACCGTAAAGAC  | CTGTAAAACACTCACAACCTCCAC  | 857 bp     |
| <i>nkx2.4b</i>  | NM_131589         | TTTCTCAGTGAGCGATATTTGAG  | CGTATAACAATTCACGTCAAAGAGG | 1058 bp    |
| <i>slc5a5</i>   | NM_001089391      | TTTGTATGGCTCAAGTTCTGTGA  | TGTTTTCTCTGTGAAATGGTGATT  | 906 bp     |
| <i>tg</i>       | NM_001329865      | TAATTGTAGTGACGGCCAGTTTAA | TTTTCTCCTGTAGCTGAAGAGGT   | 796 bp     |
| <i>tshb</i>     | NM_181494         | TCCAGACAGACATCCTCATACT   | TGAACCTATTAACCCACACCTT    | 857 bp     |

Note: A sequence containing the T3 polymerase promoter was added to the 5' end of each reverse primer sequence in order to obtain a PCR product that could be used to generate an antisense probe during *in vitro* transcription. Therefore, the final design of the reverse primers used in this study was as follows: 5' GGATCCAATTAACCCTCACTAAAGGGAA(N)<sub>24</sub> 3' with N representing the 24 nucleotides of the gene-specific reverse primer. The bases of the T3 polymerase promoter become double-stranded promoter sequence during the PCR reaction.

## Supplementary Figures 1 – 10

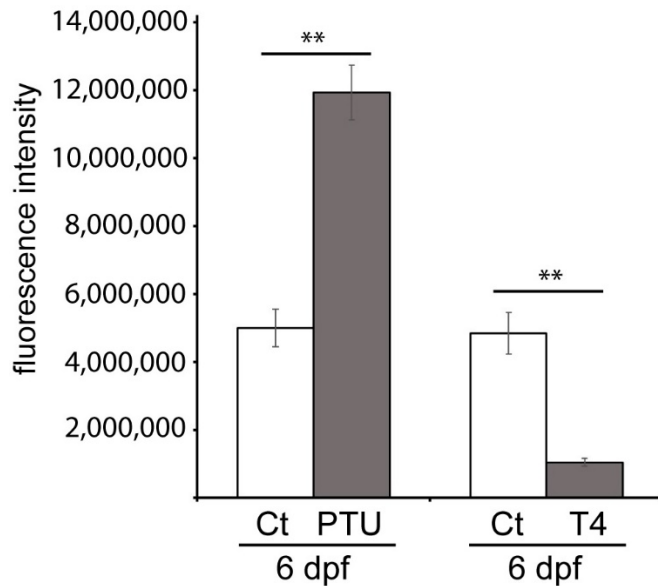

**Supplementary Figure 1: Quantification of fluorescence signal intensity in live transgenic *Tg(tg:nlsEGFP)* zebrafish larvae at 6 dpf.** Transgenic zebrafish were treated from 52 hpf onwards with 30 mg/L phenylthiourea (PTU) or 5.0  $\mu$ g/L thyroxine (T4). Fluorescent reporter signal intensities were analysed in untreated controls (Ct) and treated fish by epifluorescence microscopy. Results are shown as means $\pm$ S.E.M. ( $N=7-9$ ). Asterisks denote significant differences between treatment means (\*\*  $P < 0.01$ , Student  $t$ -test).

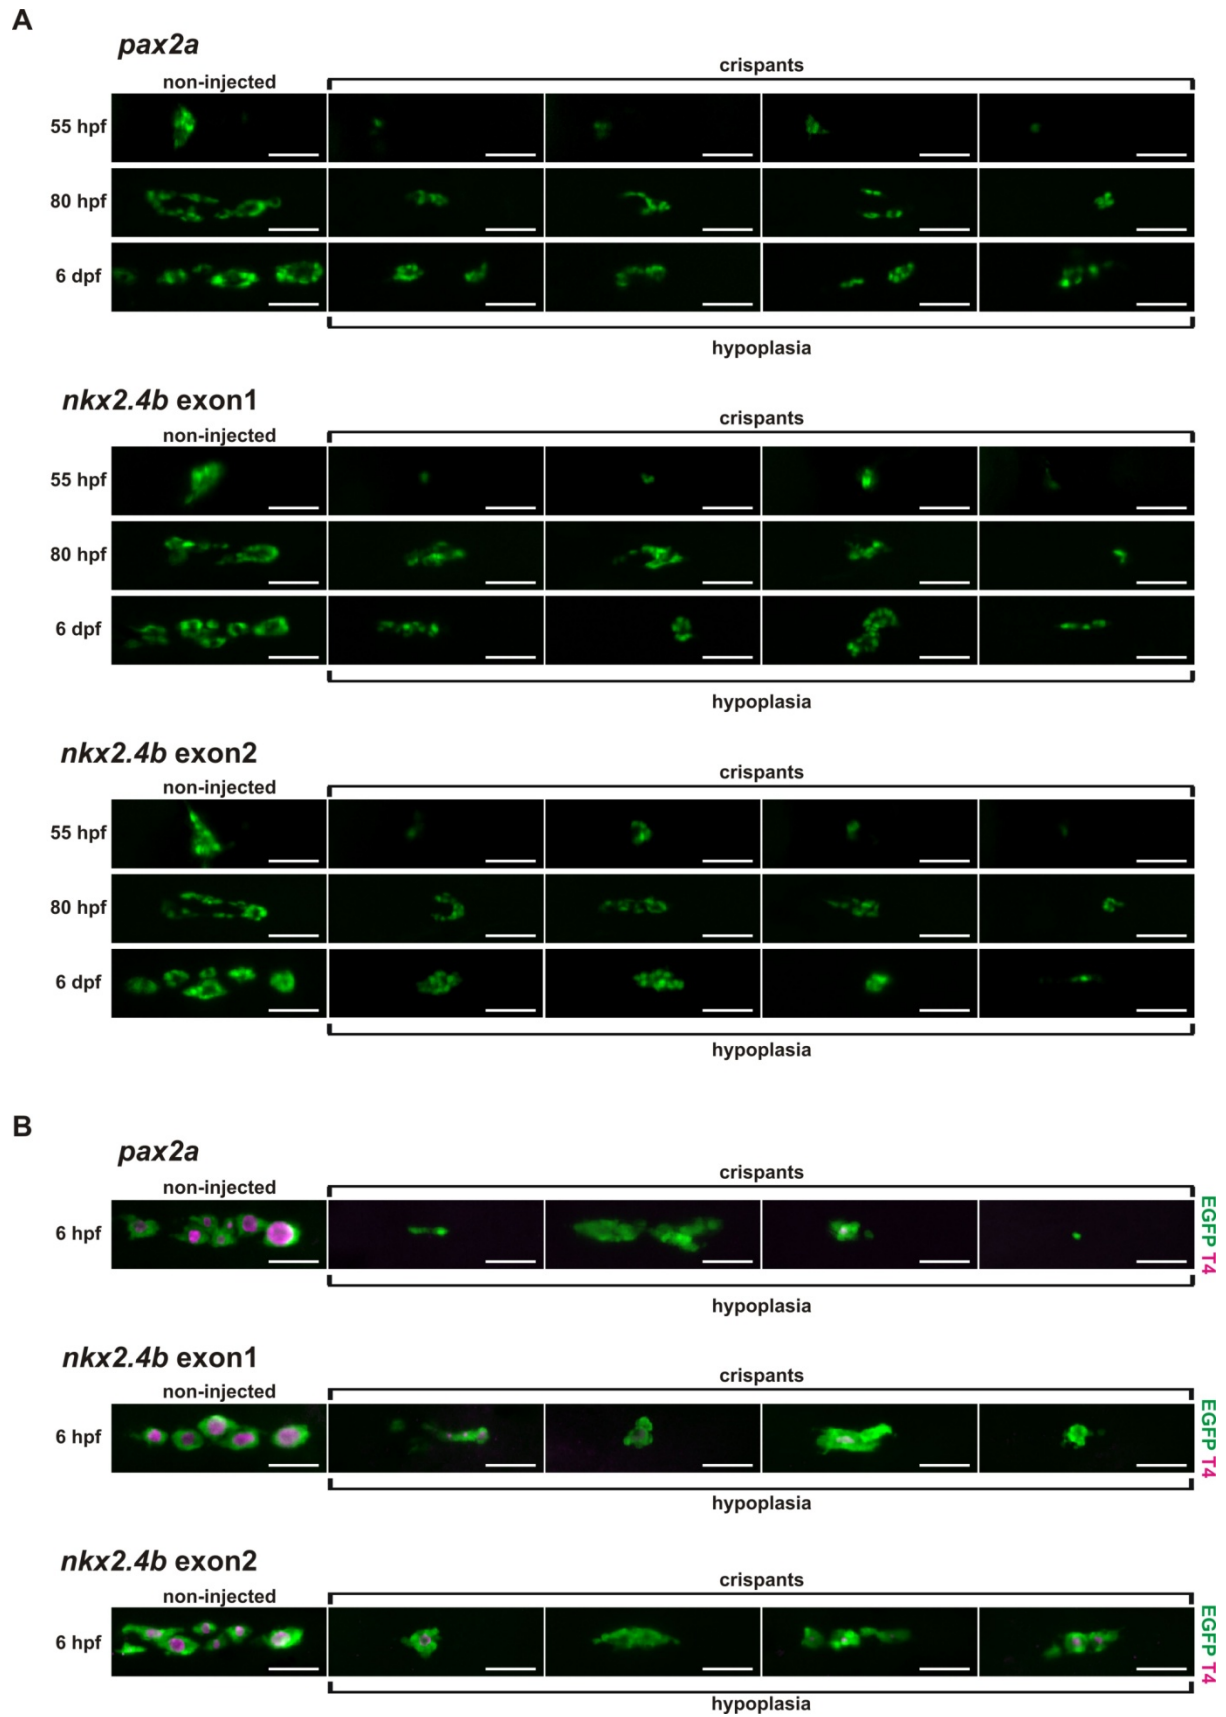

**Supplementary Figure 2: Phenotypic spectrum of *pax2a* and *nkx2.4b* crispants.** (A) Epifluorescence live imaging of *Tg(tg:nlsEGFP)* zebrafish larvae injected with Cas9 protein

and sgRNAs targeting *pax2a* or *nkx2.4b* (exon 1 and exon 2), respectively. Ventral views of the thyroid region (anterior to the right) are shown for non-injected control fish and four different crispants displaying hypoplasia of variable severity. Images were acquired at 55 hpf, 80 hpf, and 6 dpf. (B) Whole-mount immunofluorescence staining of *Tg(tg:nlsEGFP)* zebrafish for EGFP and colloidal T4 at 6 dpf. Ventral views of the thyroid region (anterior to the right) are shown for non-injected control fish and four different crispants displaying hypoplasia of variable severity. Scale bars: 50  $\mu$ M.

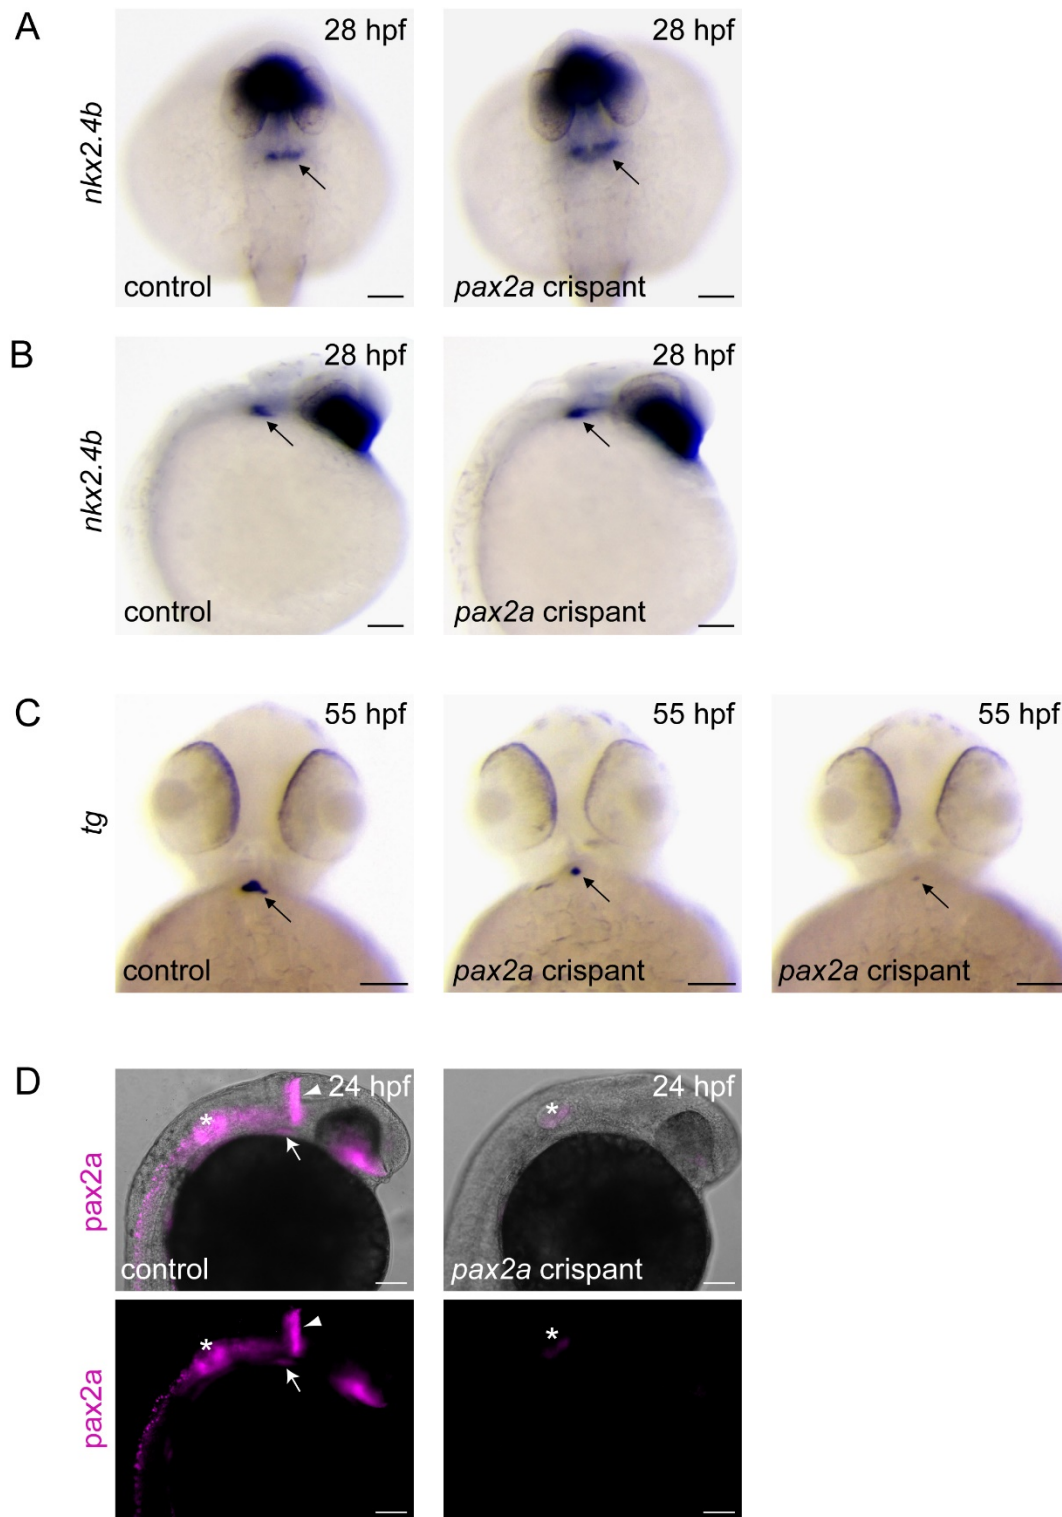

**Supplementary Figure 3: Thyroid anlage specification is not perturbed in *pax2a* crispants.** (A,B) Whole-mount *in situ* hybridization for the early thyroid marker *nkx2.4b* in non-injected control embryos and *pax2a* crispants. Thyroidal *nkx2.4b* expression (arrow) was not different between experimental groups at 28 hpf. Panel A shows dorsal views of stained specimen (anterior is to the top). Panel B shows lateral views (anterior is to the right). (C) Loss of thyroid marker expression in later stage *pax2a* crispants. Whole-mount *in situ*

hybridization for the thyroid differentiation marker *tg* in non-injected control embryos and *pax2a* crispants at 55 hpf. In contrast to the strong *tg* staining in the compact and slightly ovoid thyroid primordium of control embryos, half of the *pax2a* crispants showed either a complete absence of detectable *tg* staining (data not shown) or presented thyroid primordia of greatly reduced size. Ventral views are shown (anterior is to the top). (D) *pax2a* crispants display strongly reduced immunoreactivity to a *pax2a* antibody. Whole-mount immunofluorescence staining of *pax2a* (magenta) was performed on non-injected control embryos and *pax2a* crispants at 24 hpf using a *pax2a* antibody directed against an epitope located C-terminal to the sgRNA target site. Approximately half of the *pax2a* crispants (53.7%;  $N=79/147$ ) displayed a strongly reduced *pax2a* immunofluorescence signal. Lateral views are shown (anterior is to the right). Arrowheads: mid-hindbrain boundary; arrows: thyroid anlage; asterisks: otic vesicle. Scale bars: 100  $\mu\text{m}$ .



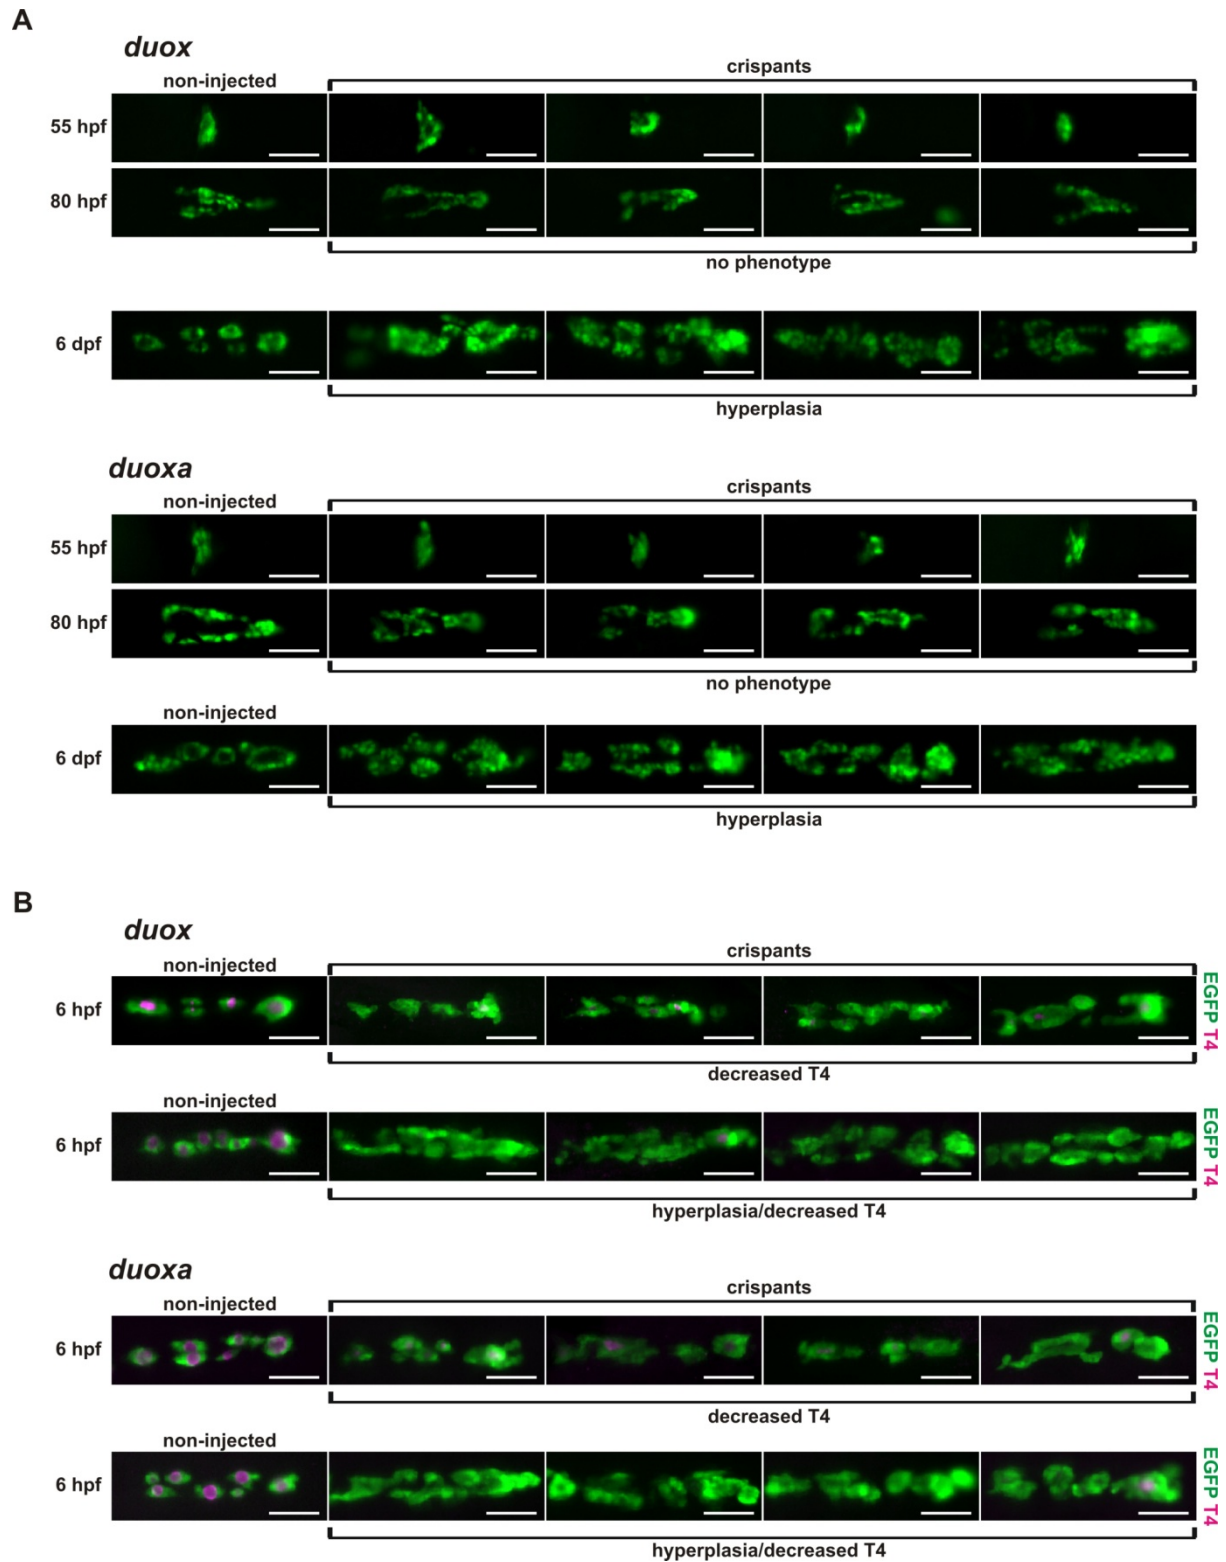

**Supplementary Figure 4: Phenotypic spectrum of *duox* and *duoxa* crispants.** (A) Epifluorescence live imaging of *Tg(tg:nlsEGFP)* zebrafish larvae injected with Cas9 protein and sgRNAs targeting *duox* or *duoxa*, respectively. Ventral views of the thyroid region (anterior to the right) are shown for non-injected control fish and four crispants. Images were acquired at 55 hpf, 80 hpf, and 6 dpf. No deviation from control thyroid morphology was

evident in *duox* and *duoxa* crispants at 55 and 80 hpf. By 6 dpf, hyperplastic thyroid enlargement (goiter) was detectable in many *duox* and *duoxa* crispants. (B) Whole-mount immunofluorescence staining of *Tg(tg:nlsEGFP)* zebrafish for EGFP and colloidal T4 at 6 dpf. Ventral views of the thyroid region (anterior to the right) are shown for non-injected control fish and different crispants displaying hypothyroidism (decreased T4 staining) that was often but not always associated with a hyperplastic thyroid enlargement. Scale bars: 50  $\mu\text{m}$ .

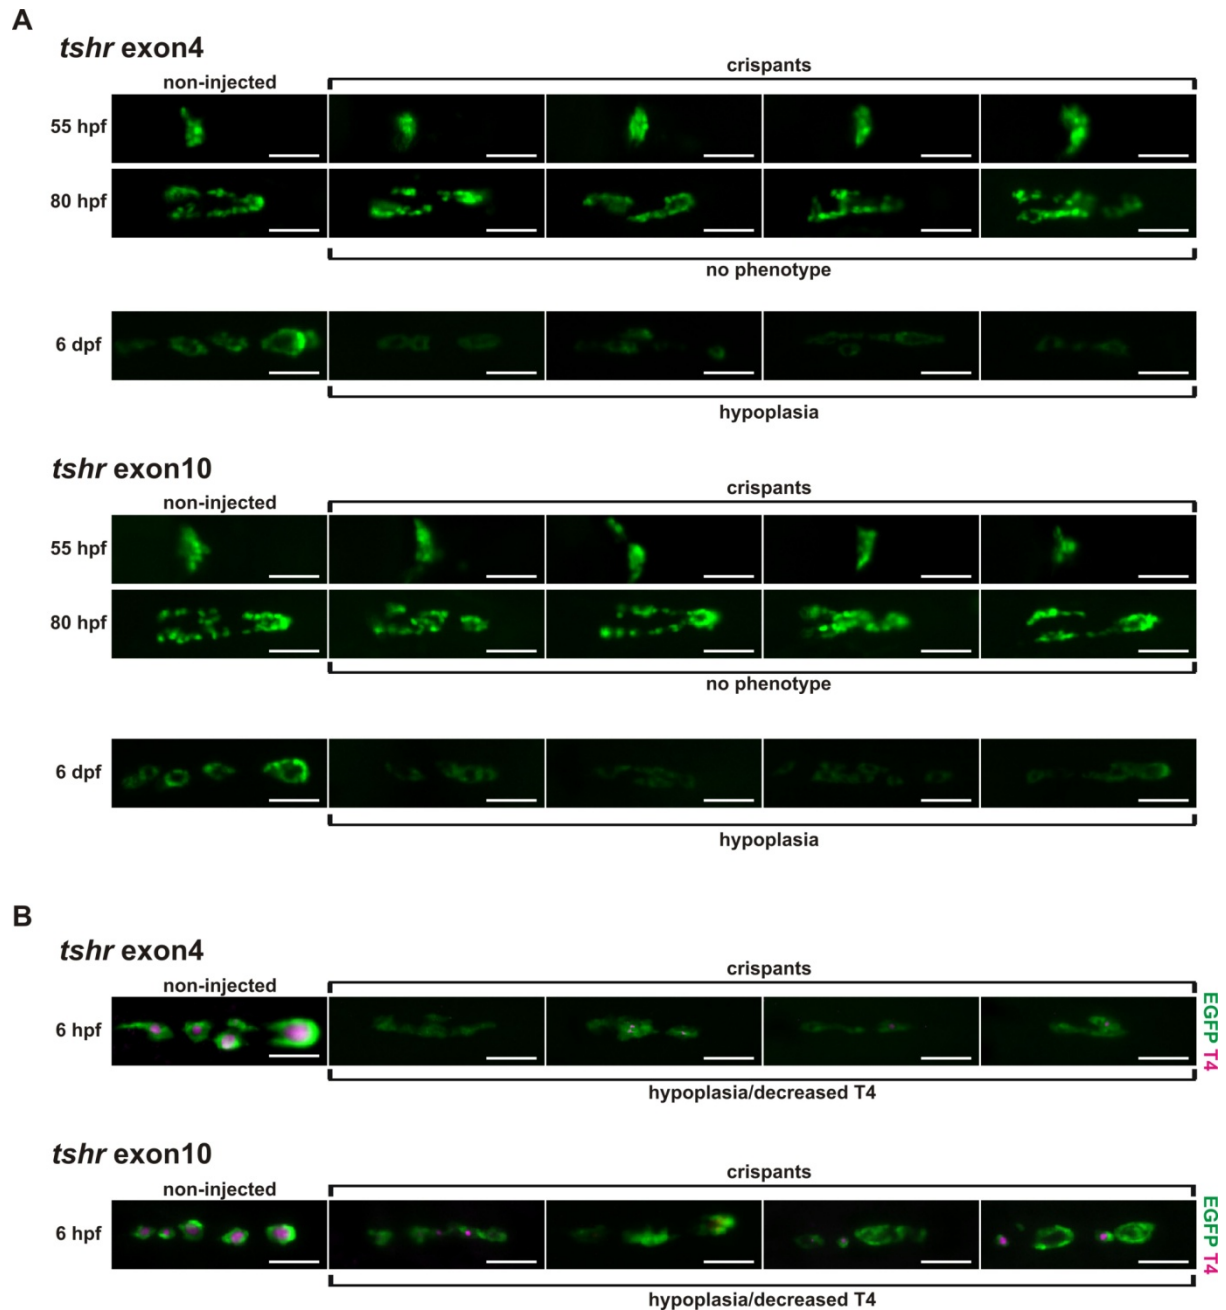

**Supplementary Figure 5: Phenotypic spectrum of *tshr* crispants.** (A) Epifluorescence live imaging of *Tg(tg:nlsEGFP)* zebrafish larvae injected with Cas9 protein and sgRNAs targeting exon 4 or exon 10 of *tshr*, respectively. Ventral views of the thyroid region (anterior to the right) are shown for non-injected control fish and four crispants. Images were acquired at 55 hpf, 80 hpf, and 6 dpf. No deviation from control thyroid morphology was evident in *tshr* crispants at 55 and 80 hpf. By 6 dpf, thyroids of *tshr* crispants had an atrophic/hypoplastic appearance and displayed a greatly reduced GFP reporter signal. (B) Whole-mount immunofluorescence staining of *Tg(tg:nlsEGFP)* zebrafish for EGFP and colloidal T4 at 6 dpf. Ventral views of the thyroid region (anterior to the right) are shown for non-injected

control fish and different *tshr* crispants displaying hypothyroidism (decreased T4 staining), variable thyroid hypoplasia and reduced GFP expression. Scale bars: 50  $\mu$ m.

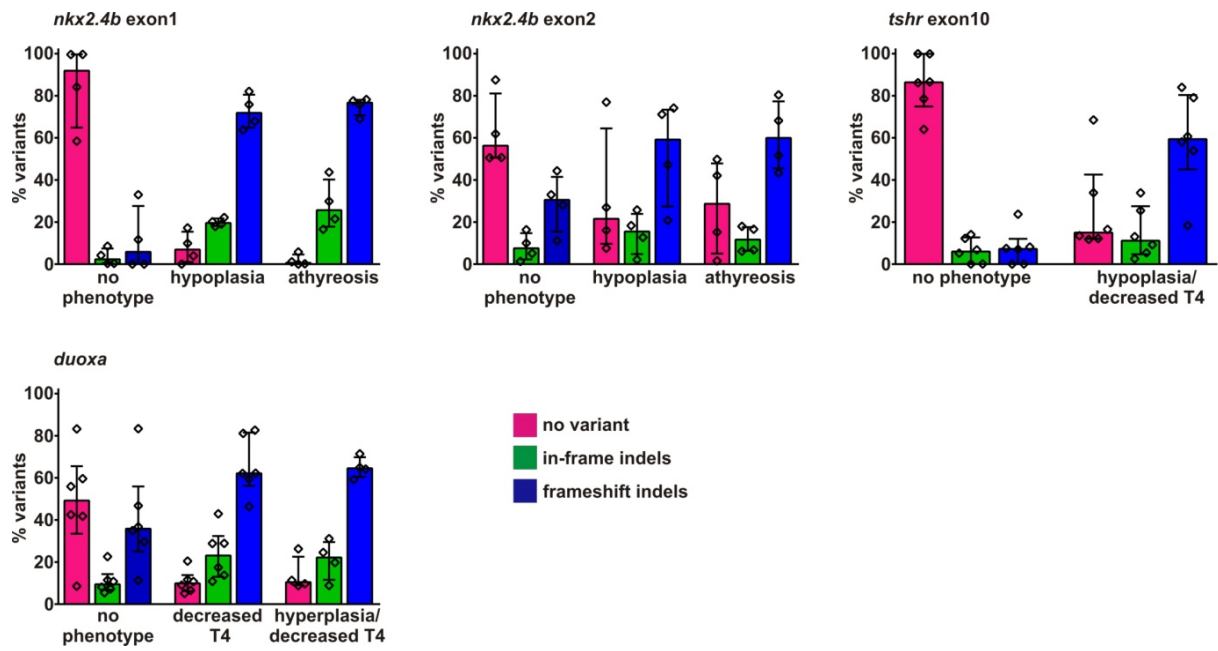

**Supplementary Figure 6: Illumina HiSeq analyses of *nkx2.4b*, *duoxa* and *tshr* crispants.**

Distribution of allelic variants as determined by Illumina HiSeq analysis of individual crispants revealed high mutagenesis efficiency in larvae presenting thyroid dysgenesis (target: exon 1 of *nkx2.4b*, exon 2 of *nkx2.4b*), thyroid hypoplasia and decreased T4 content (target: exon 10 of *tshr*) and hypothyroidism/hyperplastic thyroid enlargement (target: *duoxa*). The percentage of WT alleles (no variant call), in-frame indels, or frameshift indels is shown for  $N = 4-6$  larvae per phenotypic category (median values with interquartile range).

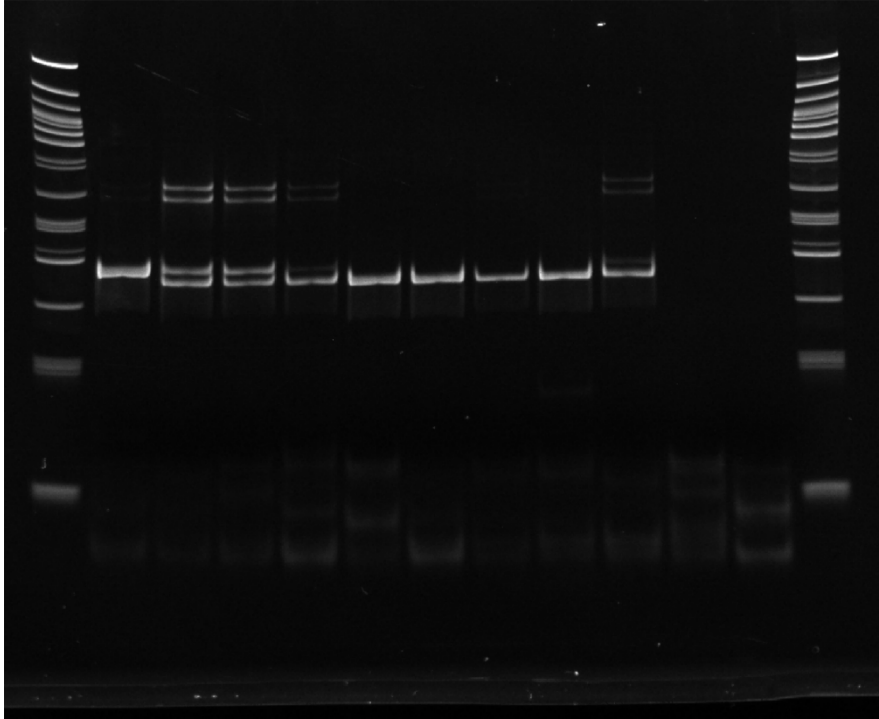

**Supplementary Figure 7: Full length gel for the cropped gel image shown in Figure 7B.** Polyacrylamide gel for PCR amplicons of wild-type fish (single PCR product of 178 bp), heterozygous carriers of the *duoxa*  $\Delta$ 11 allele (main PCR products of 178 and 167 bp) and homozygous carriers of the *duoxa*  $\Delta$ 11 allele (PCR product of 167 bp). DNA molecular size markers are shown in lane 1 and 13, wild-type sample in lane 2, heterozygous *duoxa* mutants in lane 3, 4, 5 and 10, homozygous *duoxa* mutants in lanes 6-9 and negative controls (H<sub>2</sub>O) in lane 11 and 12. Additional slow-migrating heteroduplex bands can be seen in PCR samples of heterozygous *duoxa* mutant fish (lanes 3,4,5,10).

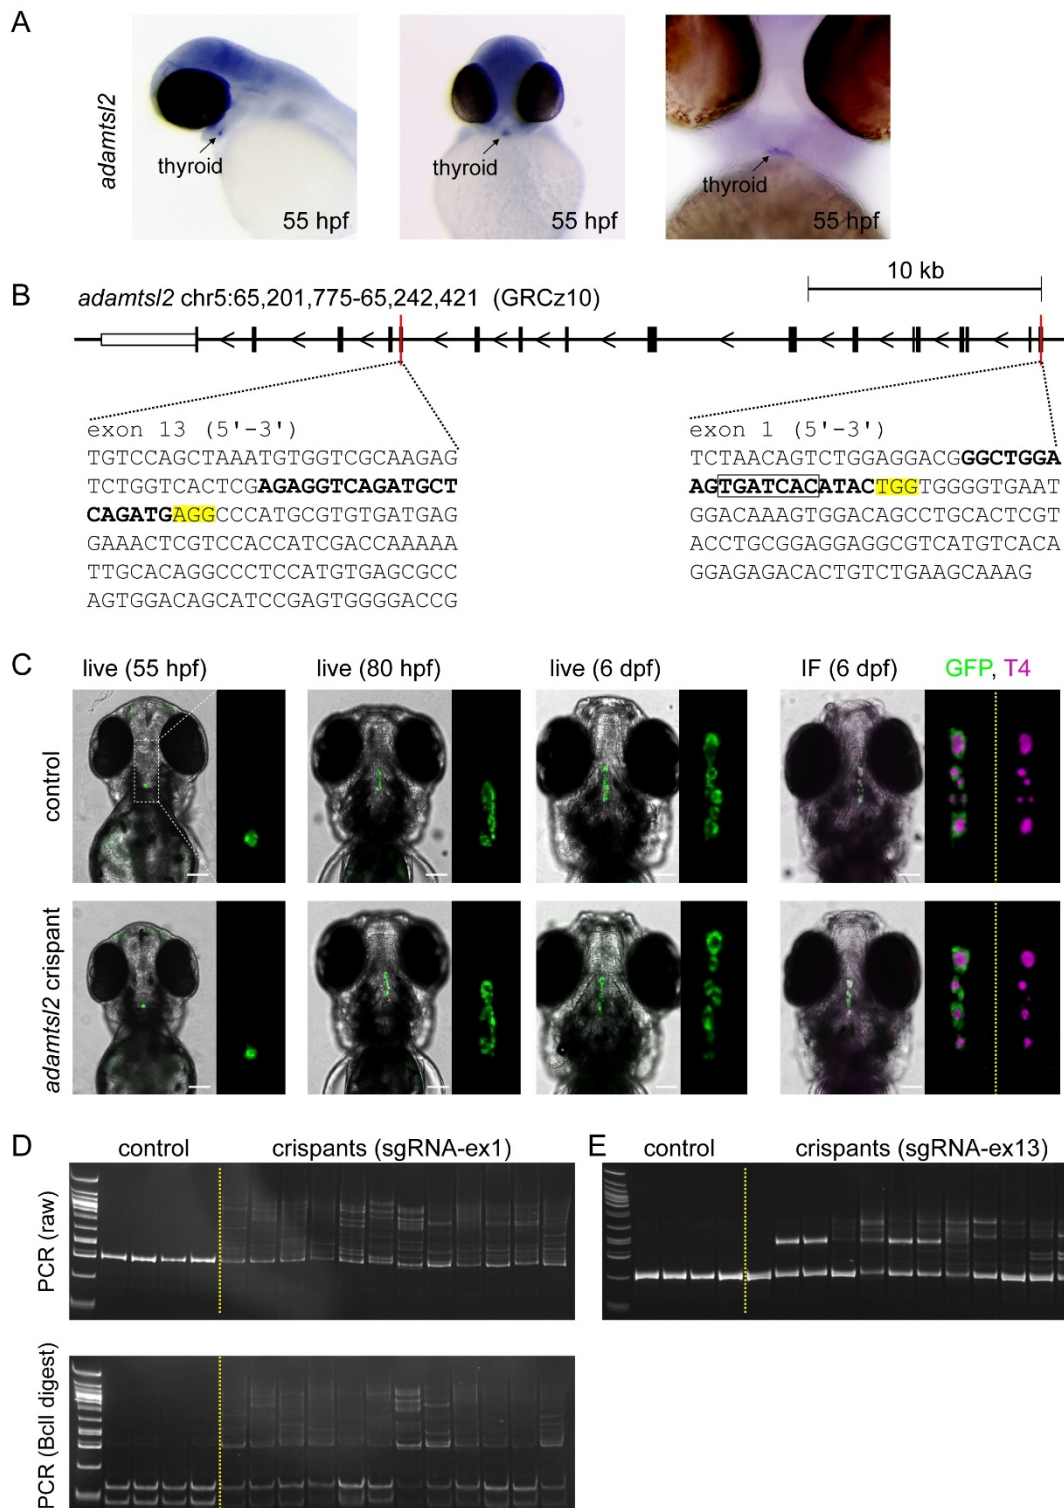

**Supplementary Figure 8: Characterization of *adamtsl2* crispants.** (A) *adamtsl2* mRNA is expressed at high levels in the zebrafish thyroid primordium (arrow) as demonstrated by whole-mount *in situ* hybridization. Lateral and frontal views of 55 hpf embryos stained with an *adamtsl2*-specific riboprobe are shown. (B) Zebrafish *adamtsl2* genomic locus on chromosome 5 with sequences for exon 1 and exon 13. Underlined sequences are target sites

for sgRNA-ex1 and sgRNA-ex13, respectively. PAM sequences are highlighted in yellow and the boxed sequence in exon 1 is the BclI restriction enzyme recognition site. (C) Thyroid phenotyping of *adamtsl2* crispants did not reveal alteration in thyroid morphogenesis or thyroid function. Results shown are from an injection experiment with sgRNA-ex13 and similar results were obtained with sgRNA-ex1. Epifluorescence live imaging of *Tg(tg:nlsEGFP)* zebrafish at 55 hpf, 80 hpf, and 6 dpf. Ventral views of the head region and 3-fold magnified views of the thyroid region (GFP channel only) are shown for non-injected controls and *adamtsl2* crispants. Whole-mount immunofluorescence (IF) staining of 6 dpf *Tg(tg:nlsEGFP)* zebrafish for EGFP (thyroid cells) and thyroxine (colloidal T4). Ventral views of the head region (anterior is to the top) and 3-fold magnified views of the thyroid region (GFP, T4) are shown. Scale bars: 100  $\mu$ m. (D) Polyacrylamide gel electrophoresis (PAGE) of PCR amplicons generated with primers spanning the target site of sgRNA-ex1. Upper panel shows a gel for PCR amplicons of *WT* larvae (single PCR product of 206 bp) and *adamtsl2* crispants (multiple slow-migrating heteroduplex bands). Lower panel shows a gel for PCR amplicons digested with BclI. Note complete digestion of PCR amplicons from *WT* larvae resulting in two restriction fragments of 111bp and 95 bp, respectively. Images of full-length gels are shown in Supplementary Figure 9A,B. (E) PAGE analysis of PCR amplicons generated with primers spanning the target site of sgRNA-ex13. Gel showing PCR amplicons of non-injected *WT* larvae (single PCR product of 151 bp) and *adamtsl2* crispants (multiple slow-migrating heteroduplex bands in most samples). Full-length gel is shown in Supplementary Figure 9C.



A

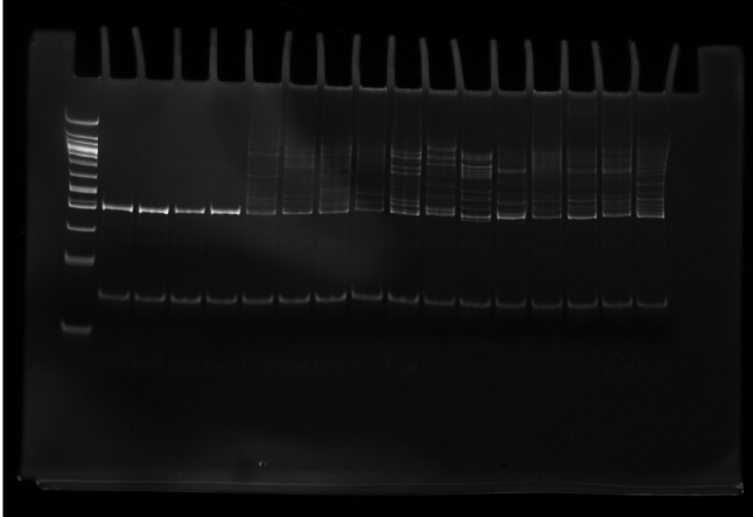

B

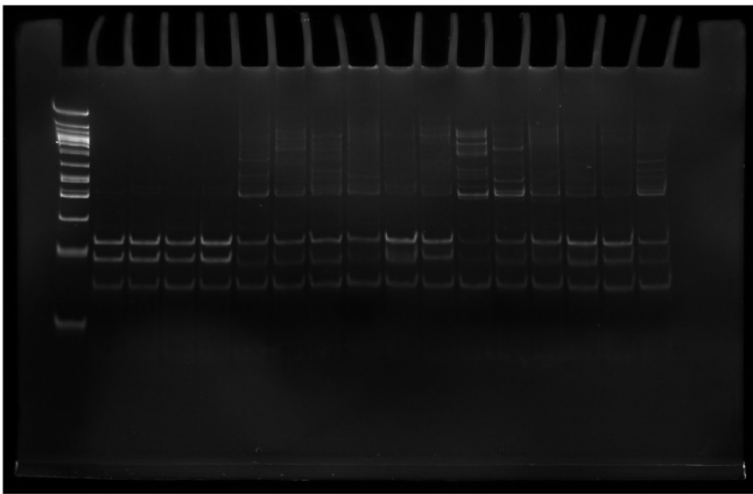

C

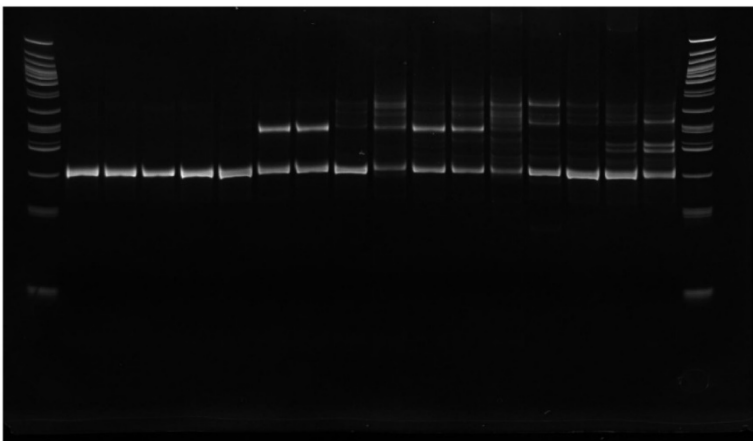

**Supplementary Figure 9: Full length gels for the cropped gels shown in Supplementary Figure 8.** (A) Full length gel for the cropped gel shown in the upper panel of Supplementary Figure 8D. (B) Full length gel for the cropped gel shown in the lower panel of Supplementary Figure 8D. (C) Full length gel for the cropped gel shown in Supplementary Figure 8E.

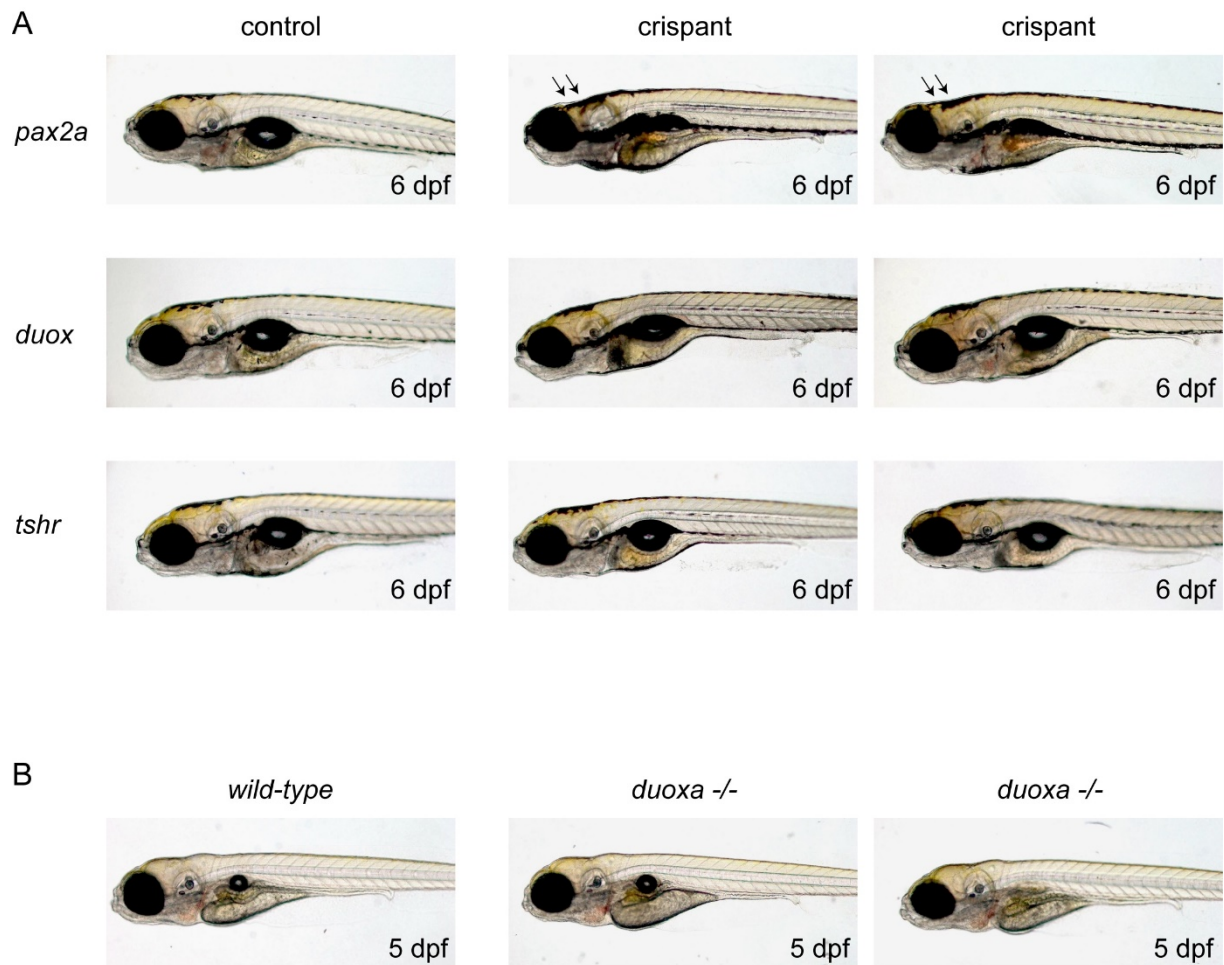

**Supplementary Figure 10: Brightfield micrographs of crispants and germline mutant fish** (A) Brightfield microscopy of control larvae and crispants displaying a thyroid phenotype after injection of gRNAs targeting *pax2a*, *duox* and *tshr*. Lateral views (anterior to the left) of 6 dpf old fish are shown. Arrows highlight defective brain development in *pax2a* crispants. (B) Brightfield microscopy of *WT* larvae and homozygous carriers of the *duoxa*  $\Delta 11$  allele. Lateral views (anterior to the left) of 5 dpf old larvae (pigment-less *casper* fish) are shown.

## Supplementary Information 2: NGS data

### **A Rapid CRISPR/Cas-based Mutagenesis Assay in Zebrafish for Identification of Genes Involved in Thyroid Morphogenesis and Function**

Trubiroha, A.<sup>1,a</sup>, Gillotay, P.<sup>1</sup>, Giusti, N.<sup>1</sup>, Gacquer, D.<sup>1</sup>, Libert, F.<sup>1</sup>, Lefort, A.<sup>1</sup>, Haerlingen, B.<sup>1</sup>, De Deken, X.<sup>1</sup>, Opitz, R.<sup>1,2</sup> and Costagliola, S.<sup>1</sup>

<sup>1</sup> Institute of Interdisciplinary Research in Molecular Human Biology (IRIBHM), Université Libre de Bruxelles, Route de Lennik 808, 1070 Brussels, Belgium

<sup>2</sup> Institute of Experimental Pediatric Endocrinology, Charité Universitätsmedizin Berlin, Augustenburger Platz 1, 13353 Berlin, Germany

A. Trubiroha, P. Gillotay and N. Giusti contributed equally to this work

<sup>a</sup> present address: German Federal Institute for Risk Assessment (BfR), Department Chemicals and Product Safety, Max-Dohrn-Strasse 8-10, 10589 Berlin, Germany

Corresponding authors:

Sabine Costagliola ([scostag@ulb.ac.be](mailto:scostag@ulb.ac.be))

Robert Opitz ([robert.opitz@charite.de](mailto:robert.opitz@charite.de))

## **Allele frequencies of individual F0 crispants as analysed by CrispRVariants.**

Data of HiSeq sequencing of zebrafish mutagenesis experiments were analysed by CrispRVariants<sup>26,45</sup>. For each target locus, variant allele plots and barplots are presented for individual zebrafish categorized by phenotype. Only variants with a frequency of  $\geq 5\%$  in at least one zebrafish were considered.

Variant allele plots show on the left the alignment of each variant to the reference genome (top line) with the sgRNA sequence and the 3' PAM indicated by boxes. The cut site is indicated by a vertical line. The gene scheme on the top shows the binding site of the sgRNA (in red) in relation to known Ensemble transcripts. Within the alignment, deletions and insertions are indicated by '-' and by symbols, respectively, with the corresponding insert sequence explained below the plot. Deletions, insertions, single nucleotide variants and chimeric reads are indicated by D, I, SNV, or 'other' respectively. Each variant is further characterized by its size and by the position of the most upstream base in relation to the cut site. For example, a 4 bp deletion starting at -4 bases upstream of the cut site would be -4:4D. The right panel of the variant allele plots shows the frequency (in read counts) of each variant for individual zebrafish with the top line indicating the total number of derived sequences. Color codes on the right represent the relative frequencies in percentages of each variant.

Barplots show the relative frequencies (x-axis) of no variant alleles, frameshift indels, inframe indels, single nucleotide variants, and chimeric reads for individual zebrafish (Y-axis) as indicated by color codes. The number of different alleles (variants) and the total number of sequences for each individual zebrafish are shown to the right of the barplots.

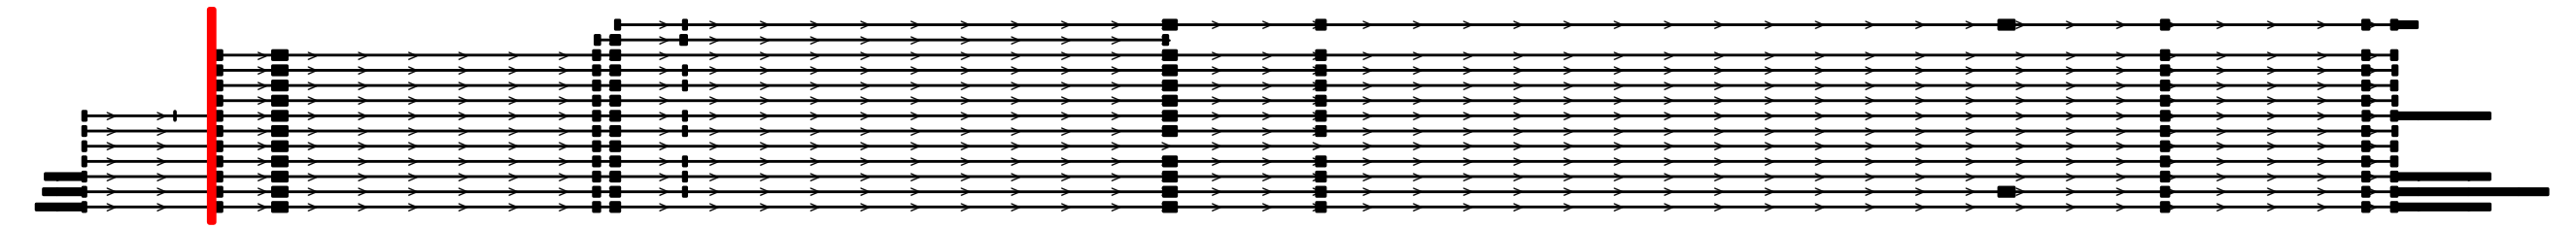

29640000 29650000 29660000 29670000

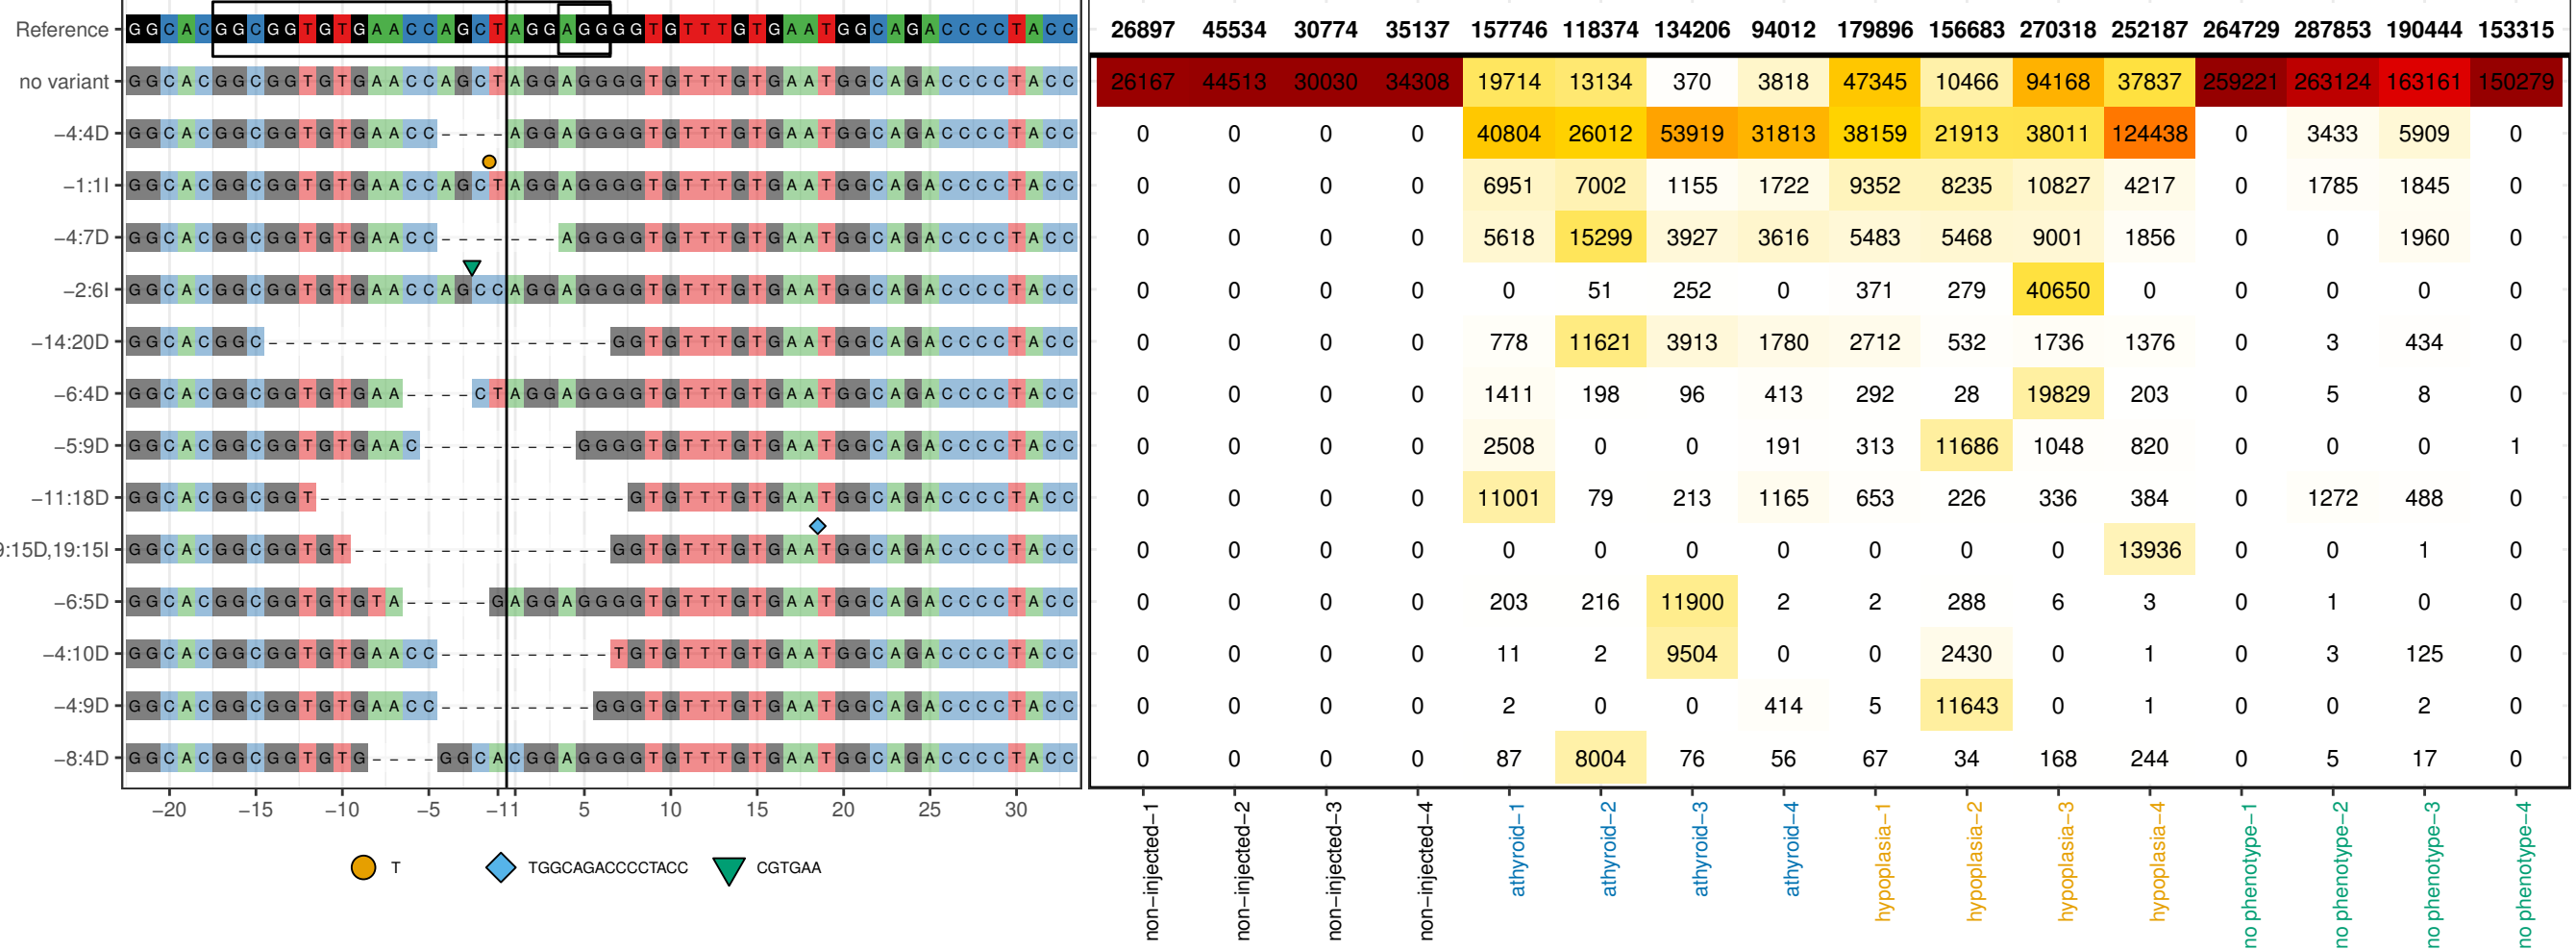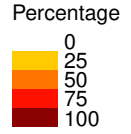

● T ◆ TGGCAGACCCCTACC ▼ CGTGAA

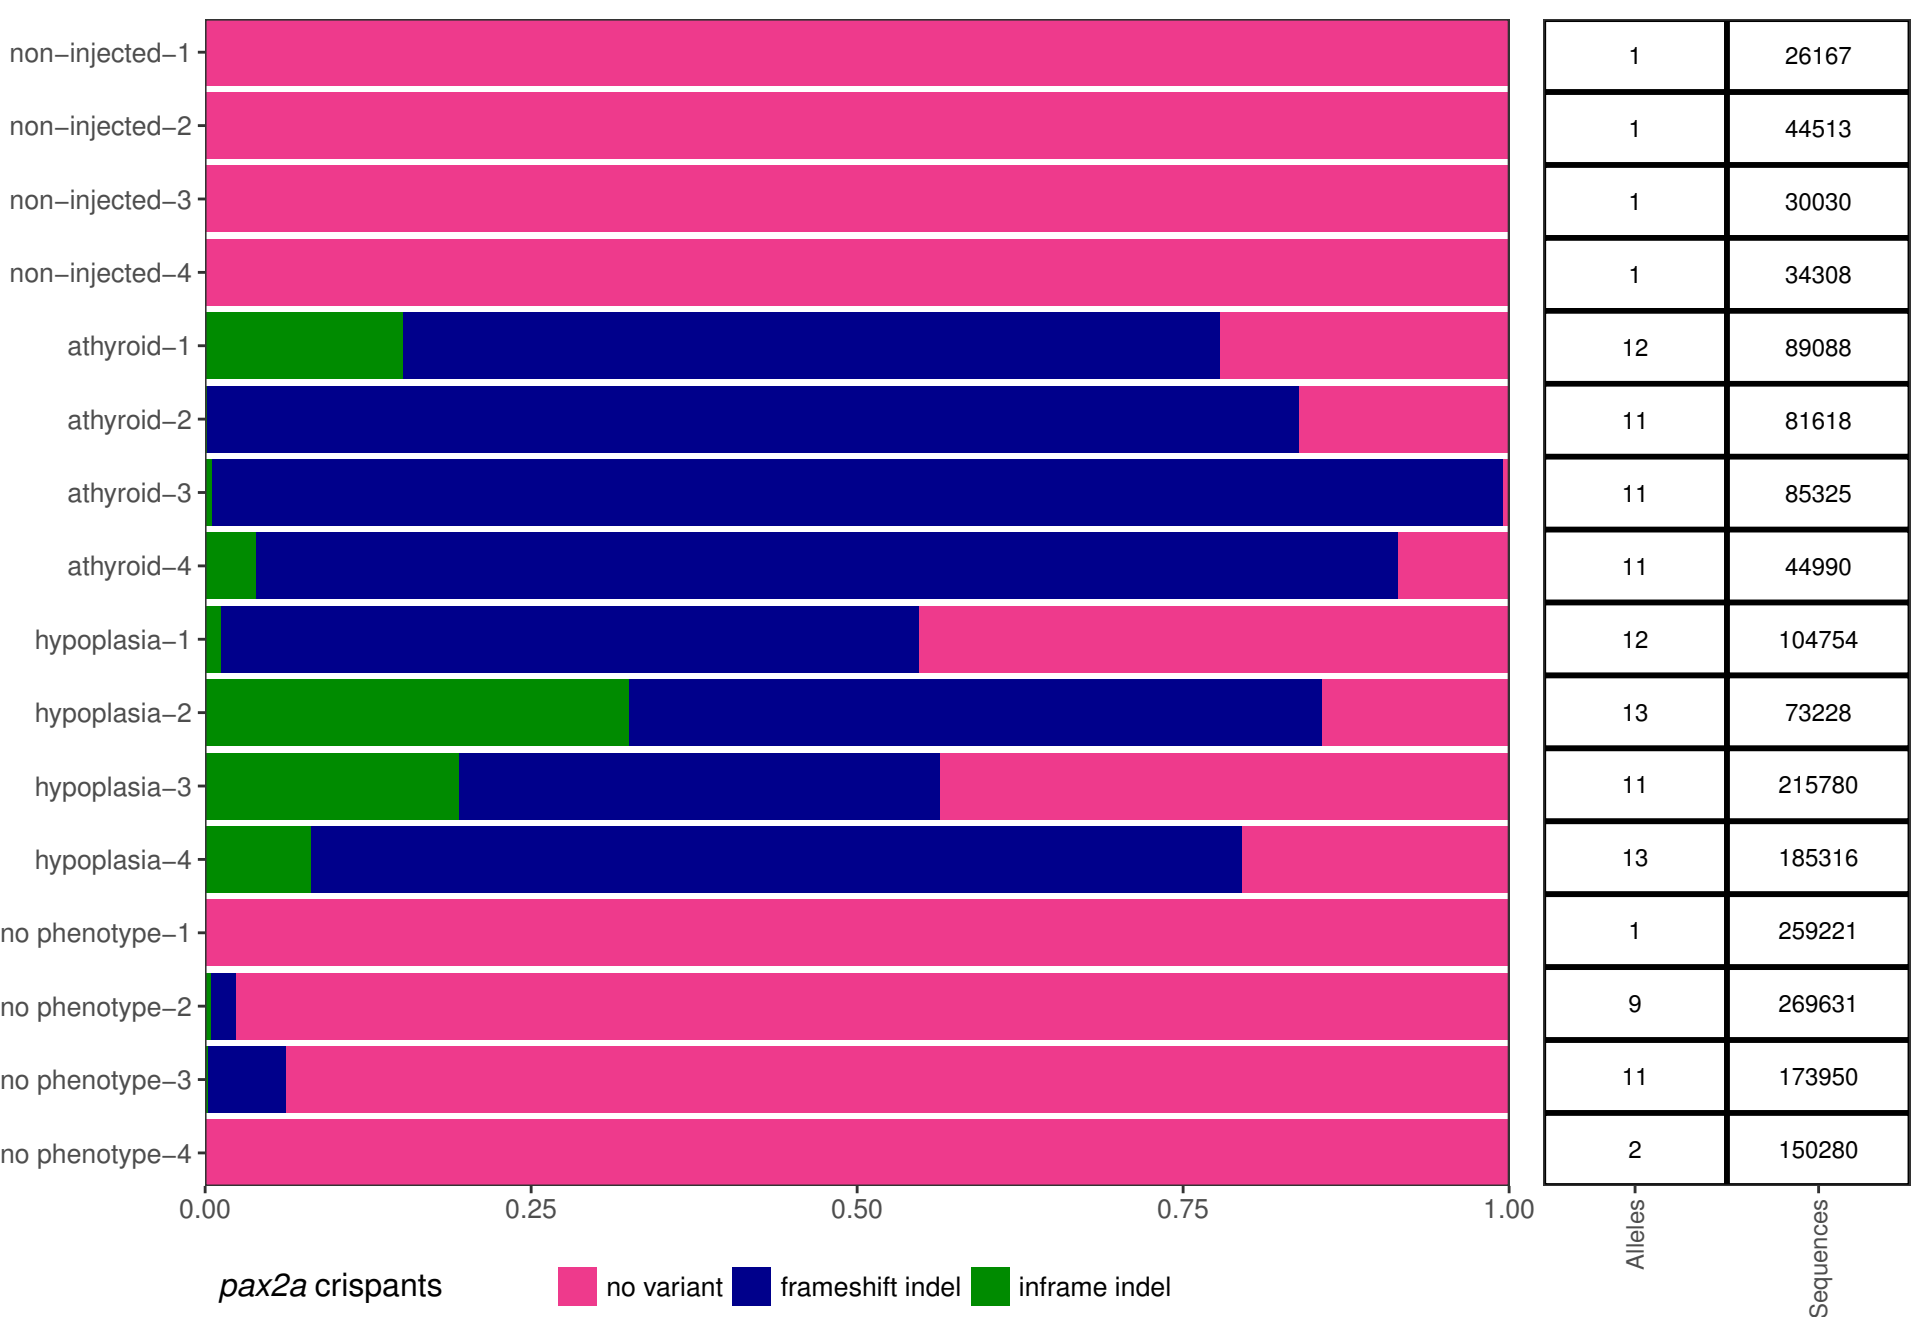

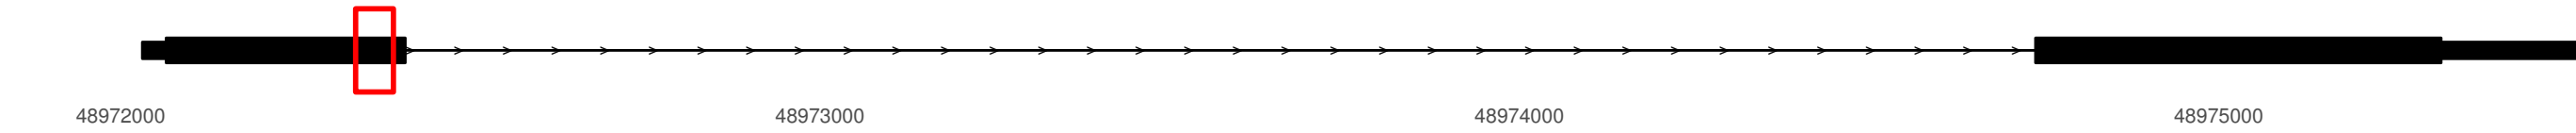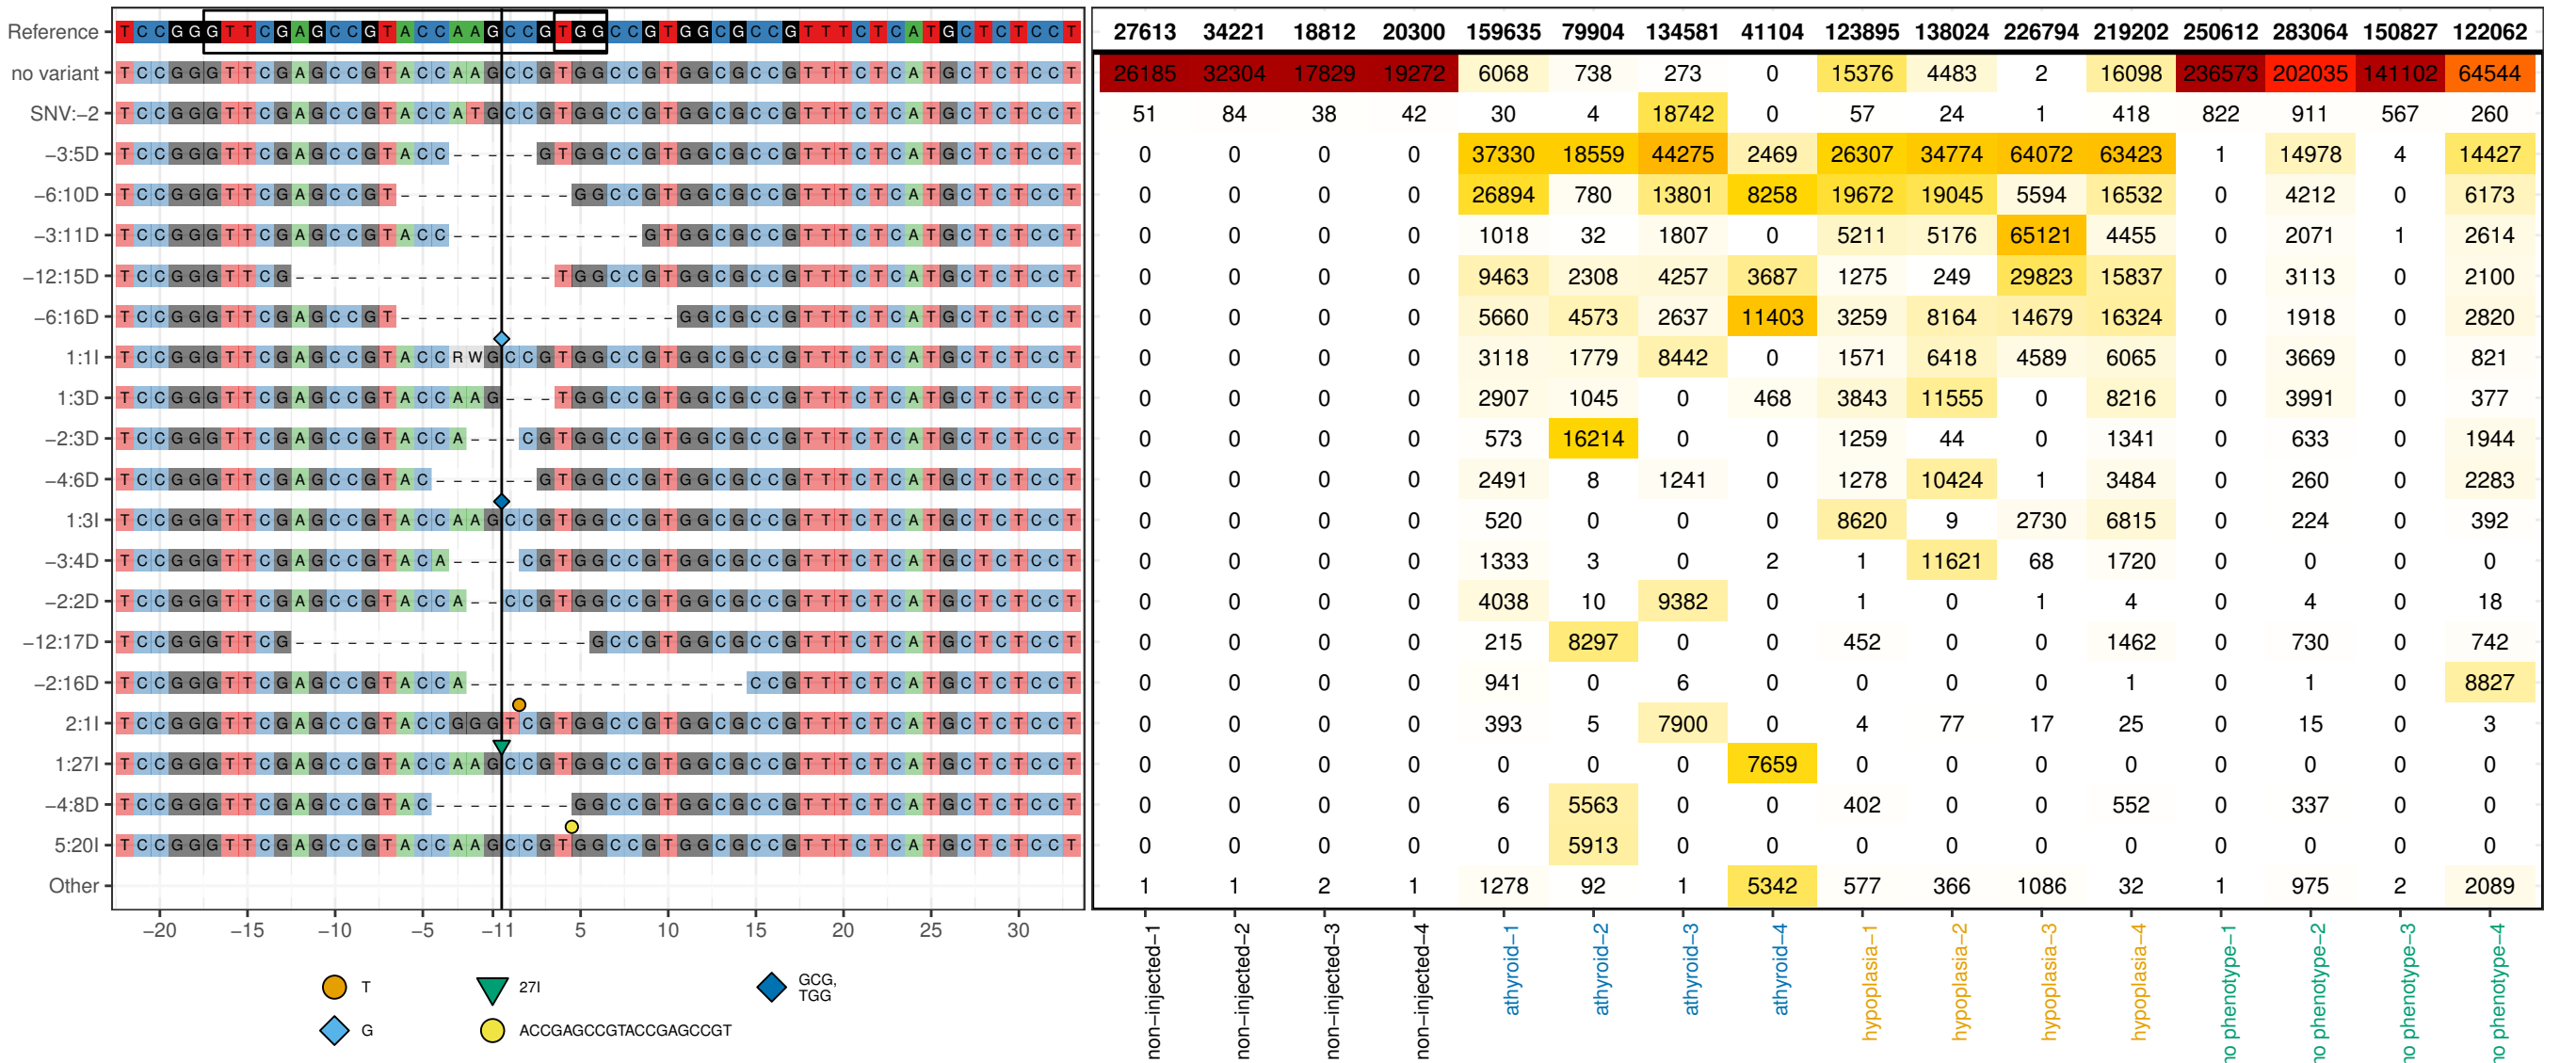

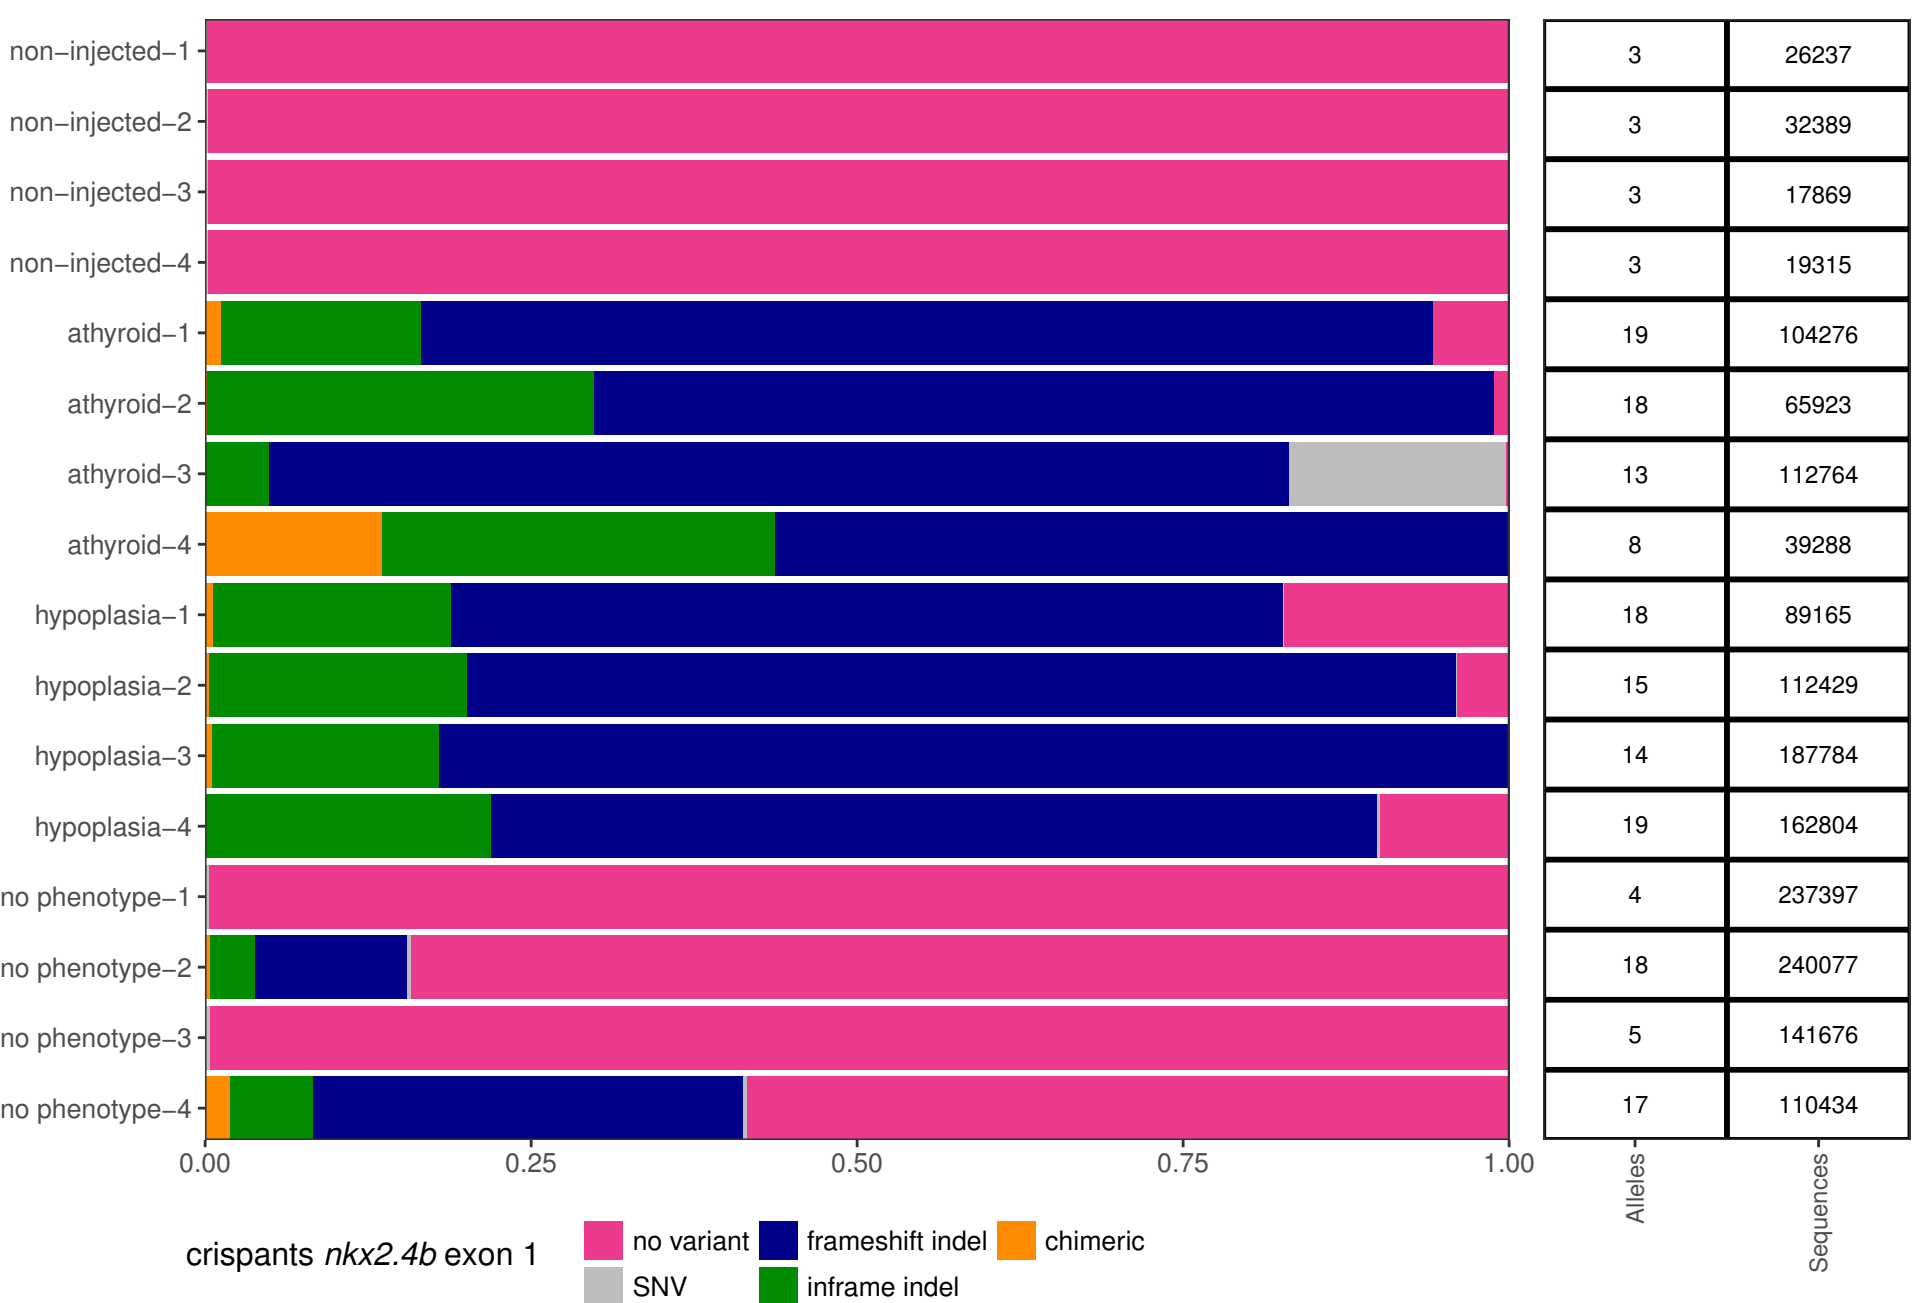



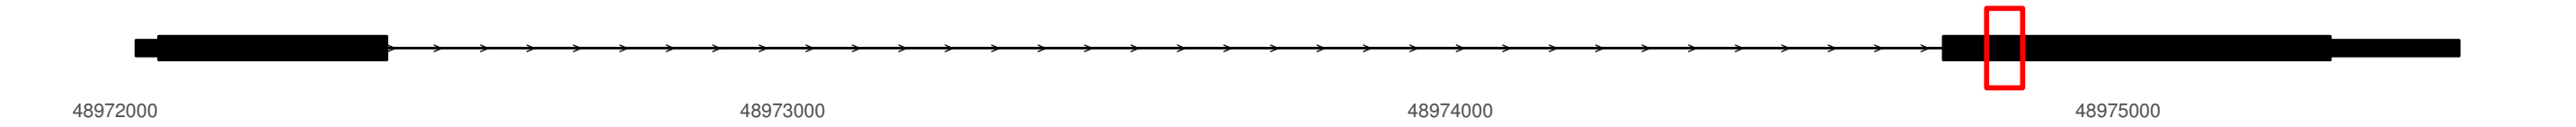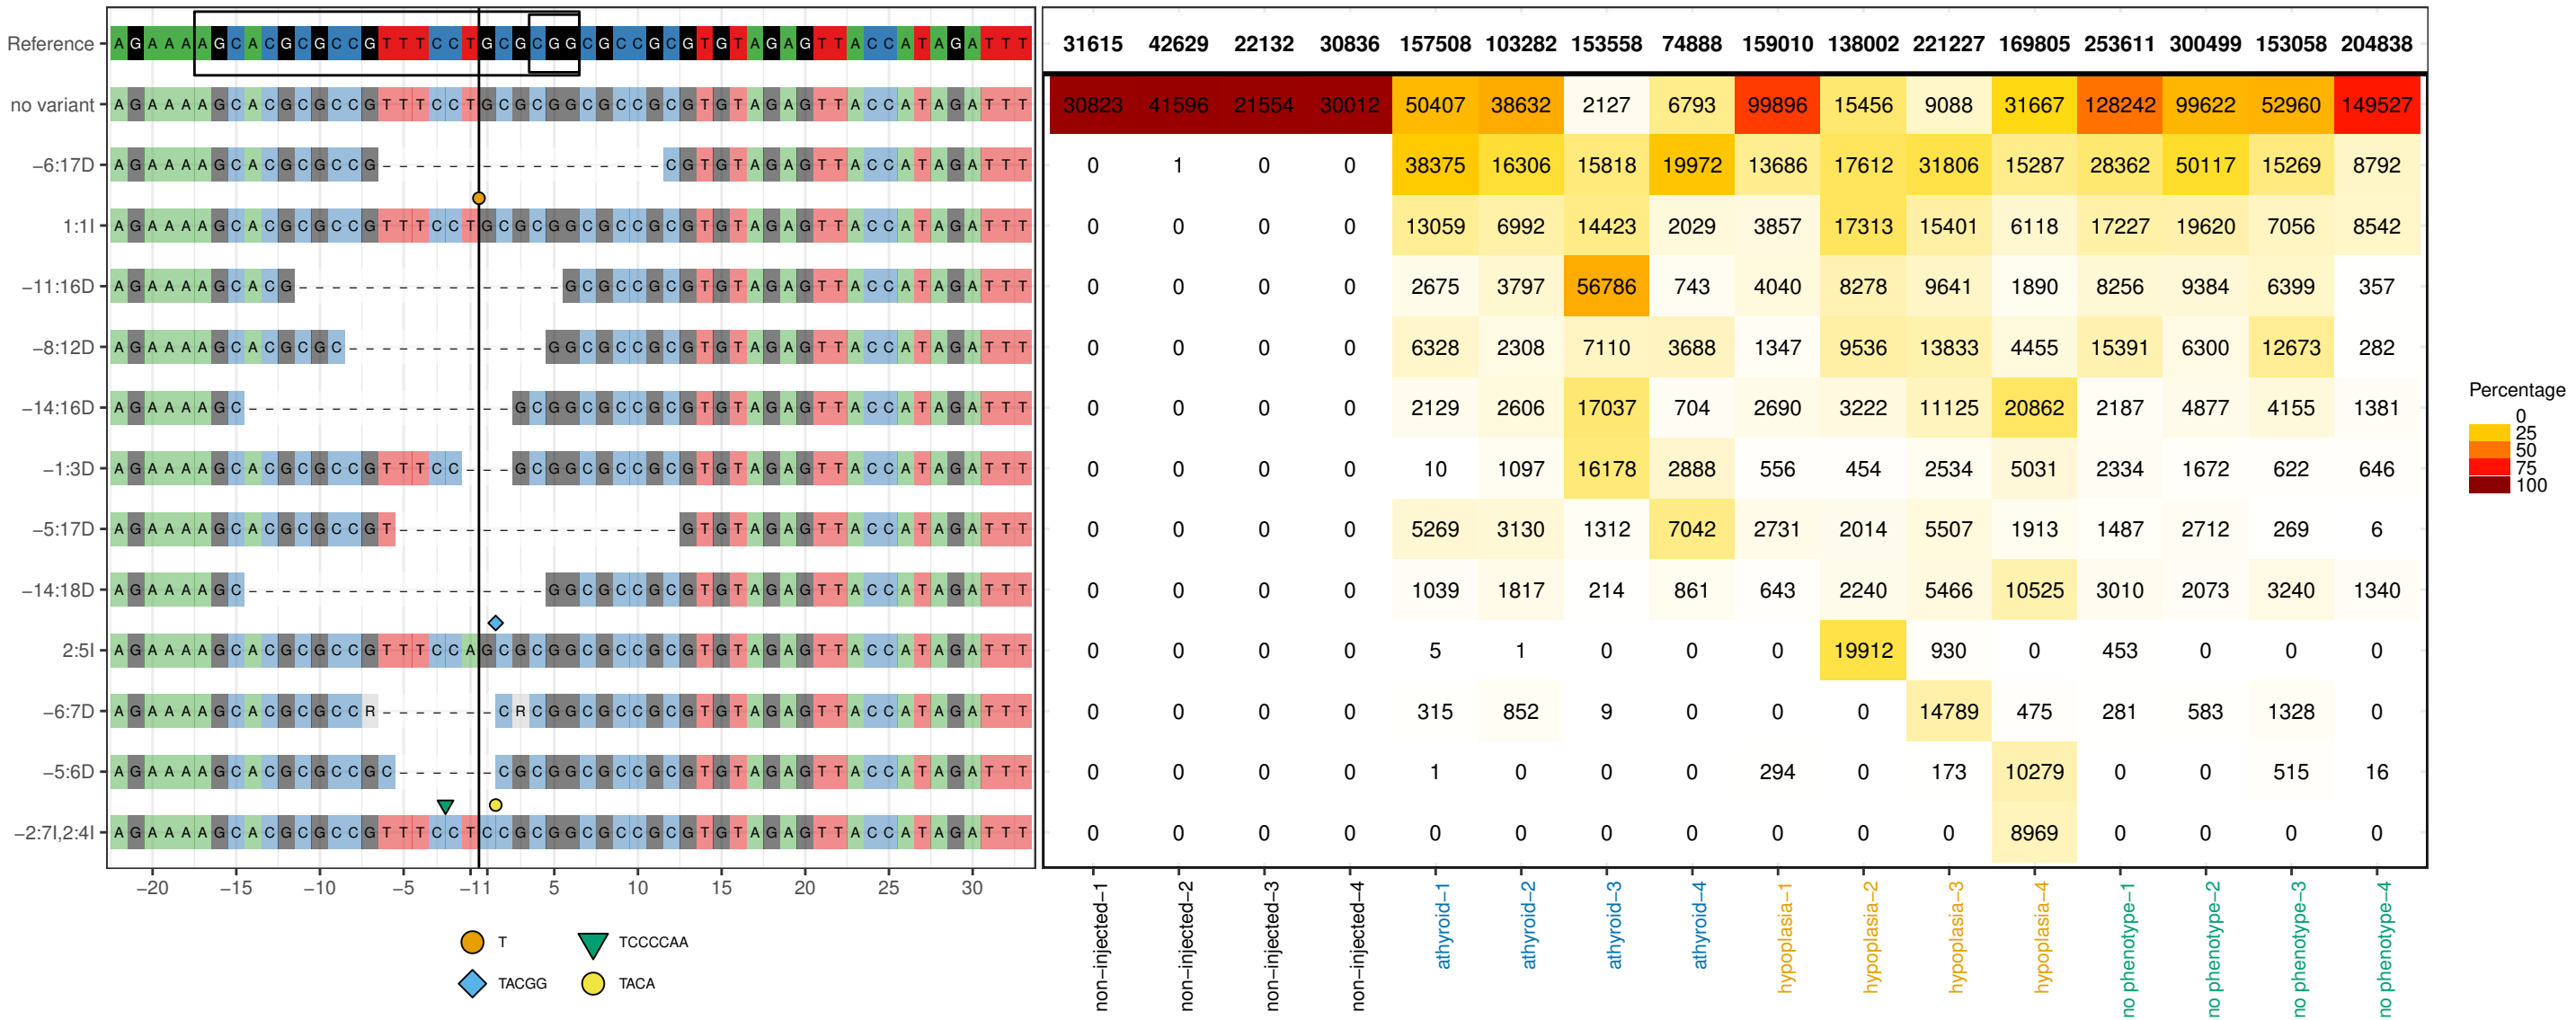

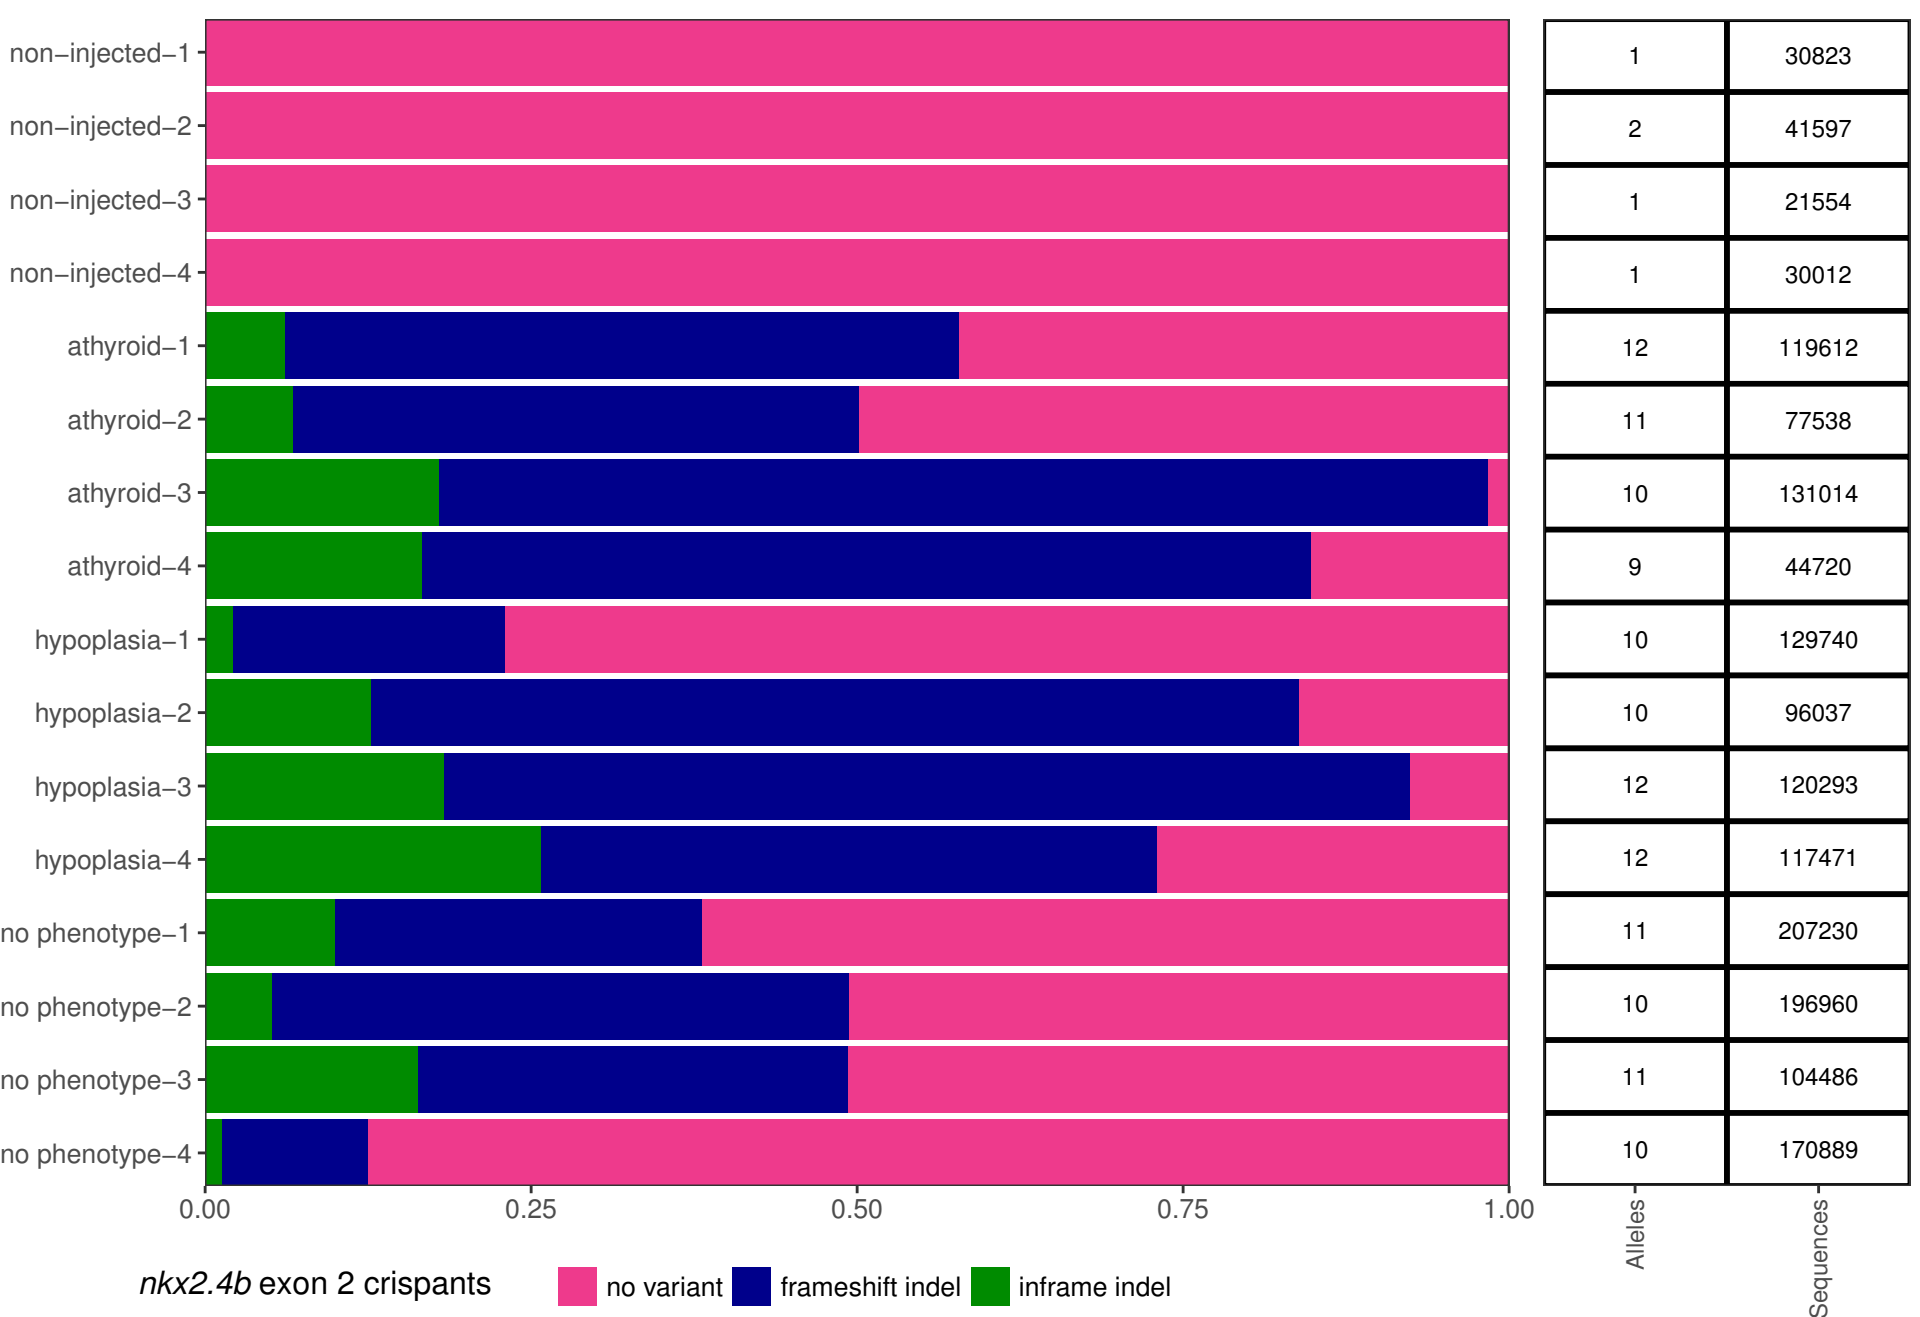

|    |        |
|----|--------|
| 1  | 30823  |
| 2  | 41597  |
| 1  | 21554  |
| 1  | 30012  |
| 12 | 119612 |
| 11 | 77538  |
| 10 | 131014 |
| 9  | 44720  |
| 10 | 129740 |
| 10 | 96037  |
| 12 | 120293 |
| 12 | 117471 |
| 11 | 207230 |
| 10 | 196960 |
| 11 | 104486 |
| 10 | 170889 |

Alleles

Sequences

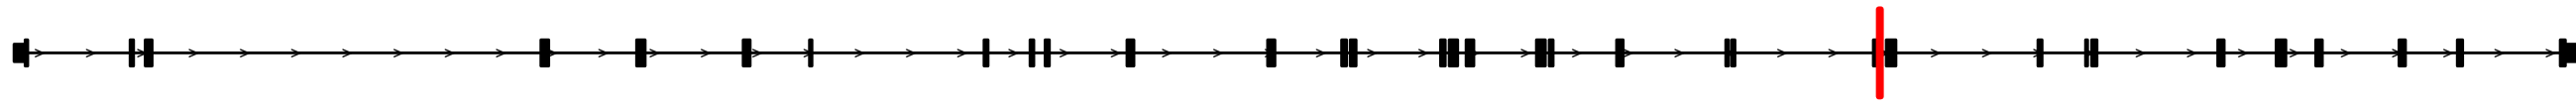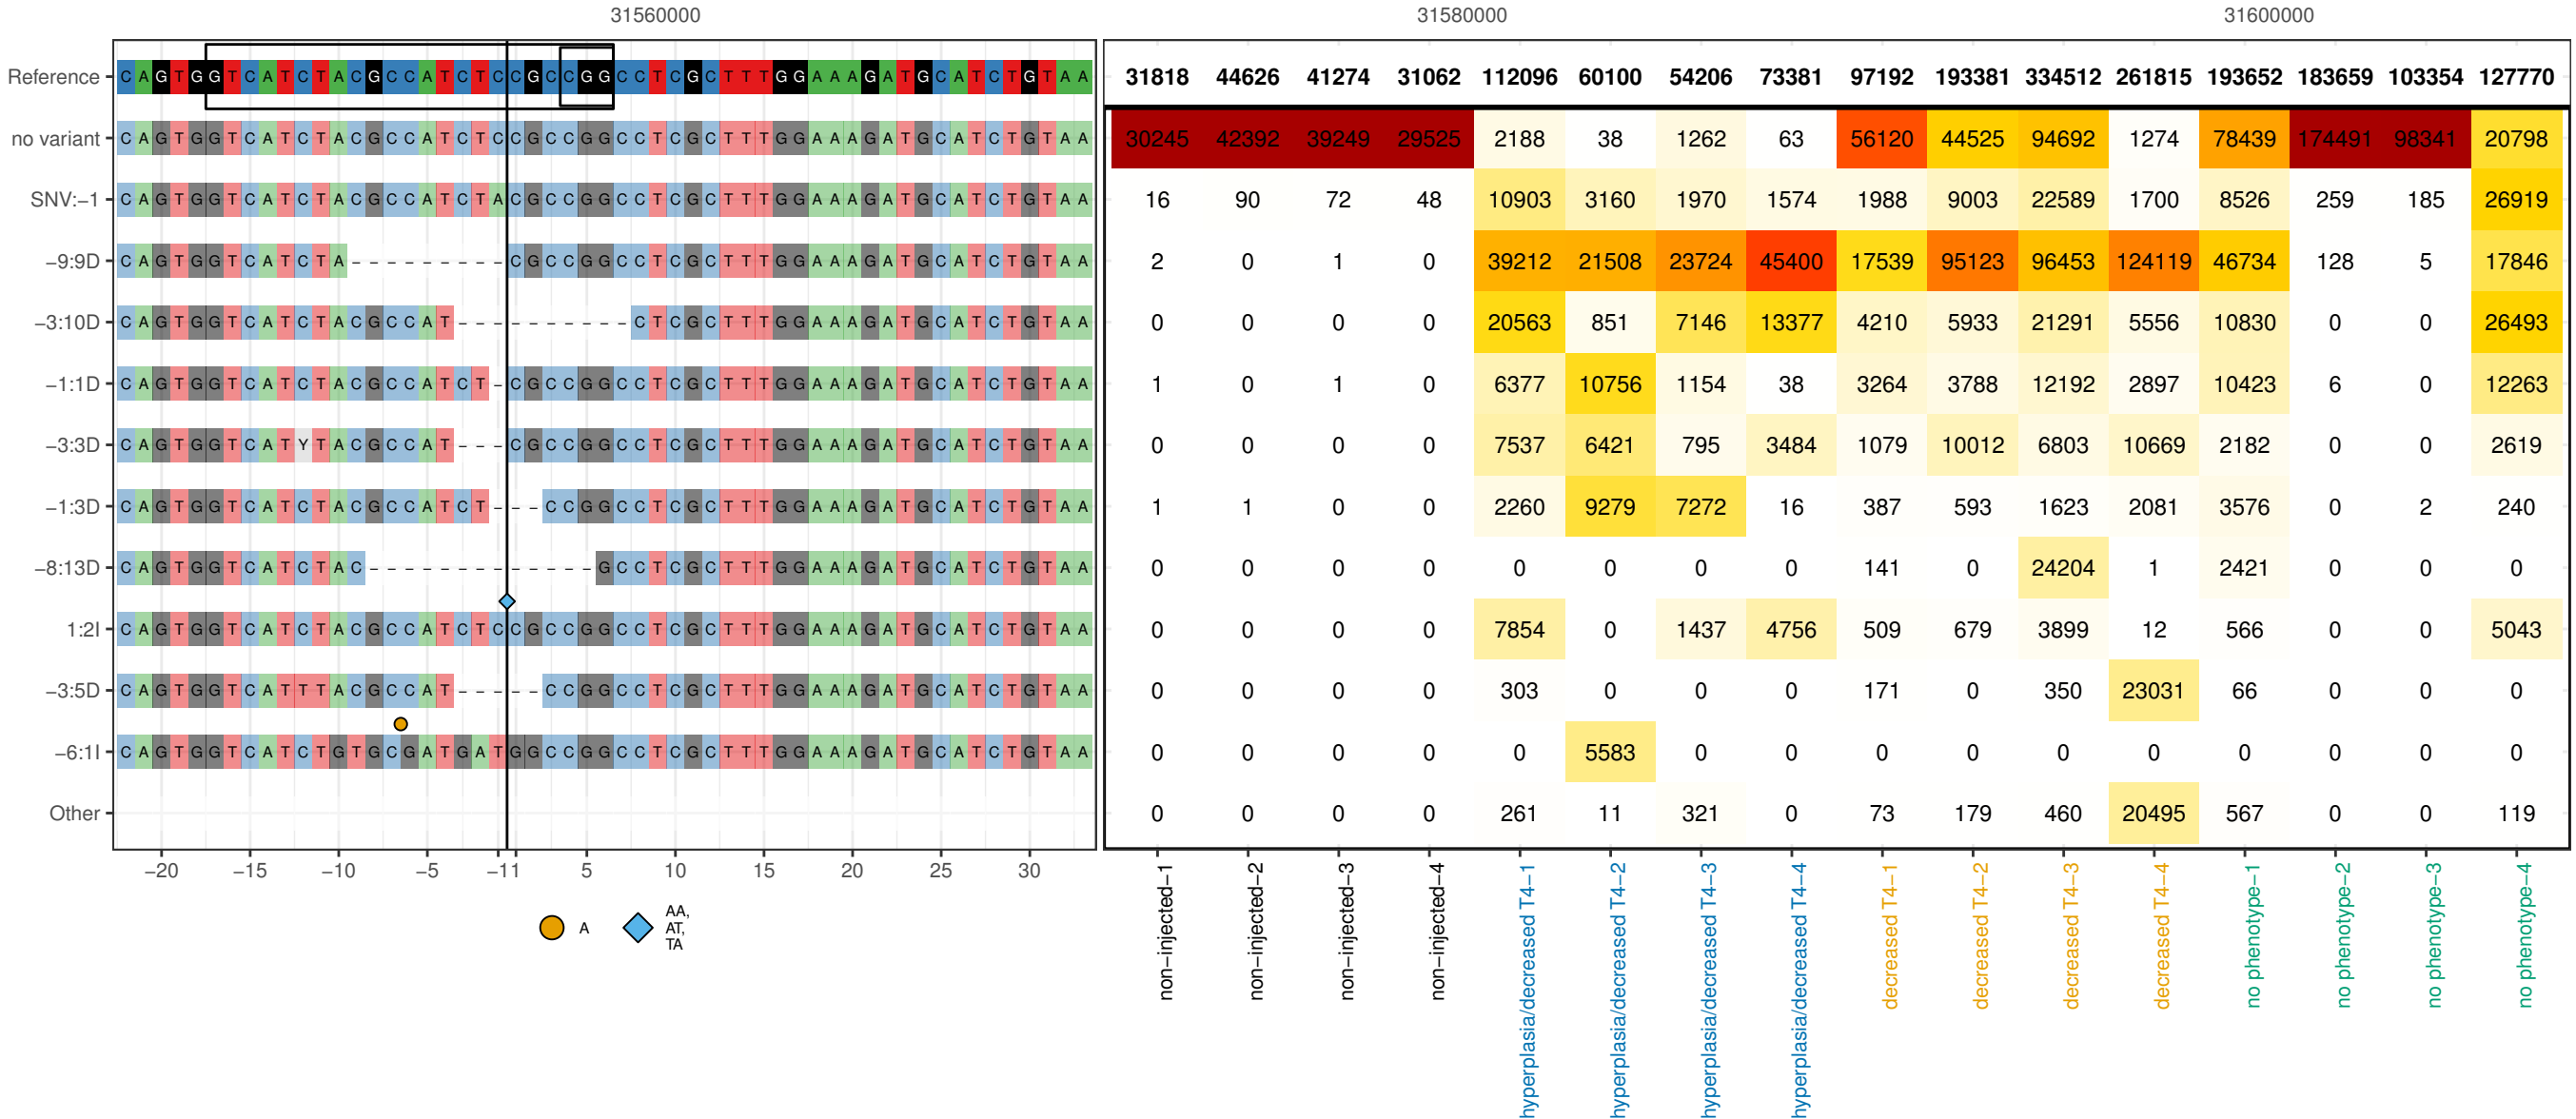

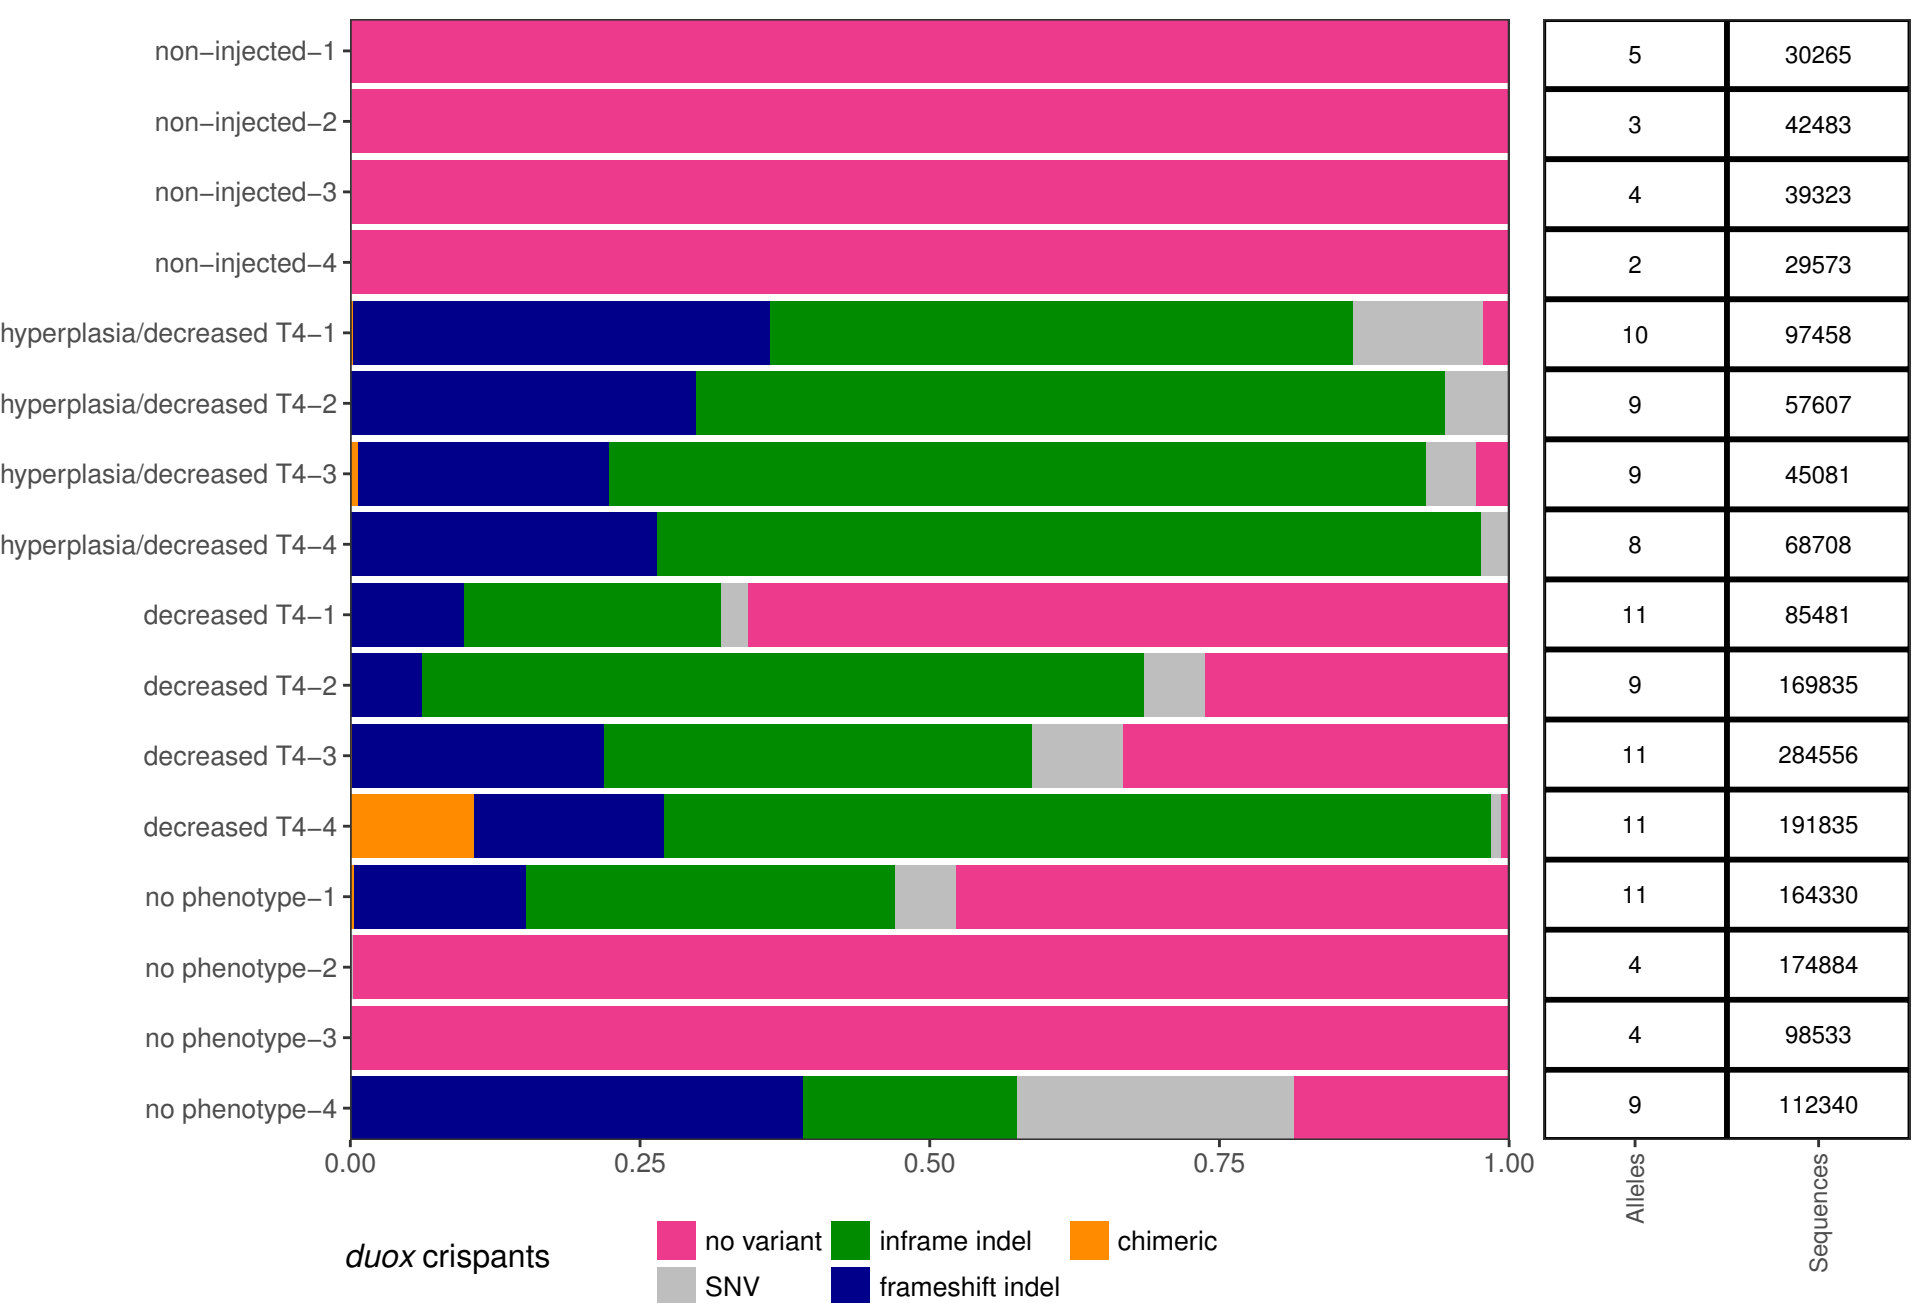

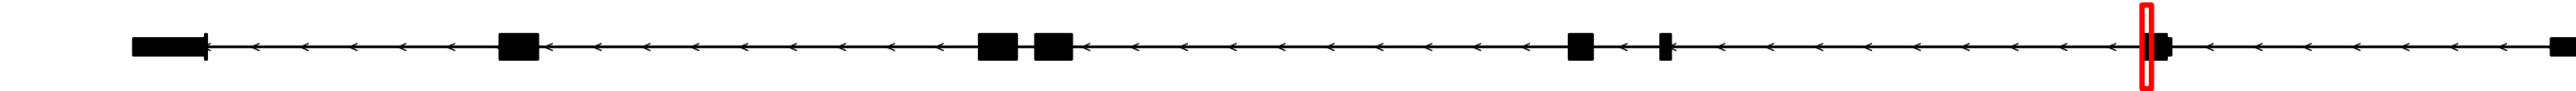

31536000 31540000 31544000

| Reference     | G C C A C G T A T T C C C G G T A G A A T G A A G A G G A A A C T G A C A G C C A G A A C C G A G A A A A C C | 30686 | 44101 | 29684 | 37836 | 39481 | 47003 | 2358291 | 8208018 | 4731125 | 7472007 | 2254844 | 3181873 | 4135931 | 6594406 | 3524667 | 8218774 | 19074  | 11769 |      |      |    |
|---------------|---------------------------------------------------------------------------------------------------------------|-------|-------|-------|-------|-------|-------|---------|---------|---------|---------|---------|---------|---------|---------|---------|---------|--------|-------|------|------|----|
| no variant    | G C C A C G T A T T C C C G G T A G A A T G A A G A G G A A A C T G A C A G C C A G A A C C G A G A A A A C C | 28026 | 40269 | 27074 | 34822 | 4019  | 8238  | 14899   | 11394   | 14999   | 9403    | 29120   | 14857   | 11322   | 16929   | 95941   | 1743451 | 181026 | 61265 | 1422 | 5406 |    |
| -5:4D         | G C C A C G T A T T C C C G G T A G A A T G A A G A G G A A A C T G A C A G C C A G A A C C G A G A A A A C C | 0     | 24    | 23    | 1     | 17144 | 5982  | 42379   | 20055   | 18295   | 23671   | 15607   | 26910   | 31500   | 52300   | 32526   | 30886   | 12358  | 23673 | 1707 | 1123 |    |
| -6:7D         | G C C A C G T A T T C C C G G T A G A A T G A A G A G G A A A C T G A C A G C C A G A A C C G A G A A A A C C | 399   | 72    | 3     | 0     | 255   | 9494  | 20415   | 40393   | 9929    | 6795    | 27853   | 39357   | 13899   | 17363   | 9860    | 16049   | 3947   | 19001 | 2201 | 475  |    |
| -1:3D         | G C C A C G T A T T C C C G G T A G A A T G A A G A G G A A A C T G A C A G C C A G A A C C G A G A A A A C C | 1     | 0     | 0     | 1     | 8729  | 2059  | 16283   | 15679   | 13993   | 8713    | 9973    | 25874   | 15664   | 15450   | 19880   | 10779   | 10420  | 9704  | 539  | 416  |    |
| -1:1I         | G C C A C G T A T T C C C G G T A G A A T G A A G A G G A A A C T G A C A G C C A G A A C C G A G A A A A C C | 0     | 0     | 0     | 0     | 891   | 915   | 2949    | 3822    | 40      | 2033    | 9013    | 6266    | 1962    | 71725   | 7092    | 17265   | 2188   | 5449  | 200  | 206  |    |
| -6:8D         | G C C A C G T A T T C C C G G T A G A A T G A A G A G G A A A C T G A C A G C C A G A A C C G A G A A A A C C | 0     | 0     | 0     | 0     | 0     | 0     | 184     | 0       | 0       | 0       | 0       | 1       | 112760  | 299     | 1       | 1       | 0      | 1     | 0    | 0    |    |
| -3:3D         | G C C A C G T A T T C C C G G T A G A A T G A A G A G G A A A C T G A C A G C C A G A A C C G A G A A A A C C | 0     | 0     | 0     | 0     | 14    | 502   | 16087   | 4096    | 45142   | 4961    | 5312    | 16803   | 3868    | 5200    | 1868    | 3541    | 281    | 1799  | 250  | 251  |    |
| -5:10D        | G C C A C G T A T T C C C G G T A G A A T G A A G A G G A A A C T G A C A G C C A G A A C C G A G A A A A C C | 0     | 0     | 0     | 0     | 263   | 642   | 12035   | 6494    | 11553   | 3801    | 4552    | 2969    | 10307   | 15529   | 3229    | 6537    | 2274   | 11022 | 177  | 115  |    |
| -1:5D         | G C C A C G T A T T C C C G G T A G A A T G A A G A G G A A A C T G A C A G C C A G A A C C G A G A A A A C C | 836   | 1479  | 1075  | 1322  | 739   | 2271  | 2236    | 1699    | 21722   | 724     | 6134    | 6823    | 3141    | 1248    | 11754   | 3465    | 404    | 4491  | 1945 | 561  |    |
| -6:9D         | G C C A C G T A T T C C C G G T A G A A T G A A G A G G A A A C T G A C A G C C A G A A C C G A G A A A A C C | 0     | 0     | 0     | 0     | 0     | 192   | 14646   | 4961    | 371     | 9711    | 5900    | 1673    | 8978    | 4788    | 5813    | 6970    | 258    | 5068  | 515  | 178  |    |
| 1:4I          | G C C A C G T A T T C C C G G T A G A A T G A A G A G G A A A C T G A C A G C C A G A A C C G A G A A A A C C | 0     | 0     | 0     | 0     | 0     | 159   | 123     | 2       | 3       | 181     | 2       | 1437    | 703     | 46176   | 2211    | 3438    | 928    | 1228  | 138  | 3    |    |
| -3:6D         | G C C A C G T A T T C C C G G T A G A A T G A A G A G G A A A C T G A C A G C C A G A A C C G A G A A A A C C | 0     | 0     | 0     | 0     | 0     | 17    | 917     | 810     | 447     | 10      | 3551    | 3138    | 1907    | 2678    | 23356   | 1374    | 870    | 250   | 41   | 135  |    |
| 1:1I          | G C C A C G T A T T C C C G G T A G A A T G A A G A G G A A A C T G A C A G C C A G A A C C G A G A A A A C C | 0     | 0     | 0     | 0     | 3     | 145   | 212     | 705     | 1       | 438     | 16259   | 731     | 172     | 1161    | 2255    | 5646    | 867    | 8     | 24   | 17   |    |
| -1:16D, 19:4D | G C C A C G T A T T C C C G G T A G A A T G A A G A G G A A A C T G A C A G C C A G A A C C G A G A A A A C C | 0     | 0     | 0     | 0     | 0     | 0     | 0       | 0       | 0       | 0       | 0       | 0       | 0       | 0       | 0       | 0       | 0      | 27586 | 0    | 0    | 0  |
| 1:7I          | G C C A C G T A T T C C C G G T A G A A T G A A G A G G A A A C T G A C A G C C A G A A C C G A G A A A A C C | 0     | 0     | 0     | 0     | 0     | 0     | 0       | 0       | 18130   | 1       | 177     | 6       | 1888    | 255     | 354     | 242     | 472    | 0     | 1    | 0    | 21 |
| -1:2I         | G C C A C G T A T T C C C G G T A G A A T G A A G A G G A A A C T G A C A G C C A G A A C C G A G A A A A C C | 0     | 0     | 0     | 0     | 3555  | 98    | 6297    | 192     | 6       | 306     | 909     | 112     | 1760    | 2635    | 2230    | 301     | 177    | 1323  | 57   | 0    |    |
| -1:2D         | G C C A C G T A T T C C C G G T A G A A T G A A G A G G A A A C T G A C A G C C A G A A C C G A G A A A A C C | 0     | 0     | 0     | 0     | 0     | 106   | 557     | 1       | 661     | 9233    | 368     | 516     | 274     | 2980    | 2673    | 749     | 0      | 271   | 131  | 113  |    |
| -1:1D         | G C C A C G T A T T C C C G G T A G A A T G A A G A G G A A A C T G A C A G C C A G A A C C G A G A A A A C C | 1     | 0     | 0     | 1     | 0     | 272   | 2961    | 3       | 2548    | 176     | 3099    | 146     | 875     | 970     | 649     | 904     | 1105   | 1538  | 3298 | 19   |    |
| -1:10I        | G C C A C G T A T T C C C G G T A G A A T G A A G A G G A A A C T G A C A G C C A G A A C C G A G A A A A C C | 0     | 0     | 0     | 0     | 0     | 88    | 479     | 2       | 0       | 0       | 310     | 14364   | 249     | 2       | 1       | 633     | 0      | 2     | 289  | 5    |    |
| -1:5I         | G C C A C G T A T T C C C G G T A G A A T G A A G A G G A A A C T G A C A G C C A G A A C C G A G A A A A C C | 0     | 0     | 0     | 0     | 0     | 144   | 270     | 526     | 4       | 749     | 3920    | 834     | 1318    | 16      | 4092    | 447     | 3      | 611   | 1225 | 26   |    |
| 1:17I         | G C C A C G T A T T C C C G G T A G A A T G A A G A G G A A A C T G A C A G C C A G A A C C G A G A A A A C C | 0     | 0     | 0     | 0     | 0     | 0     | 0       | 1       | 0       | 0       | 3       | 0       | 2       | 1558    | 1       | 2       | 352    | 0     | 1291 | 0    |    |
| -2:7D         | G C C A C G T A T T C C C G G T A G A A T G A A G A G G A A A C T G A C A G C C A G A A C C G A G A A A A C C | 0     | 0     | 0     | 0     | 0     | 4     | 19      | 18      | 1       | 3       | 247     | 65      | 493     | 7       | 3       | 386     | 3      | 6     | 1145 | 0    |    |

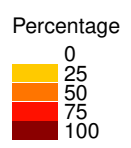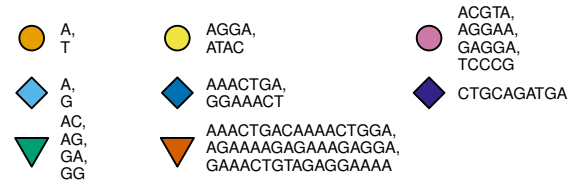

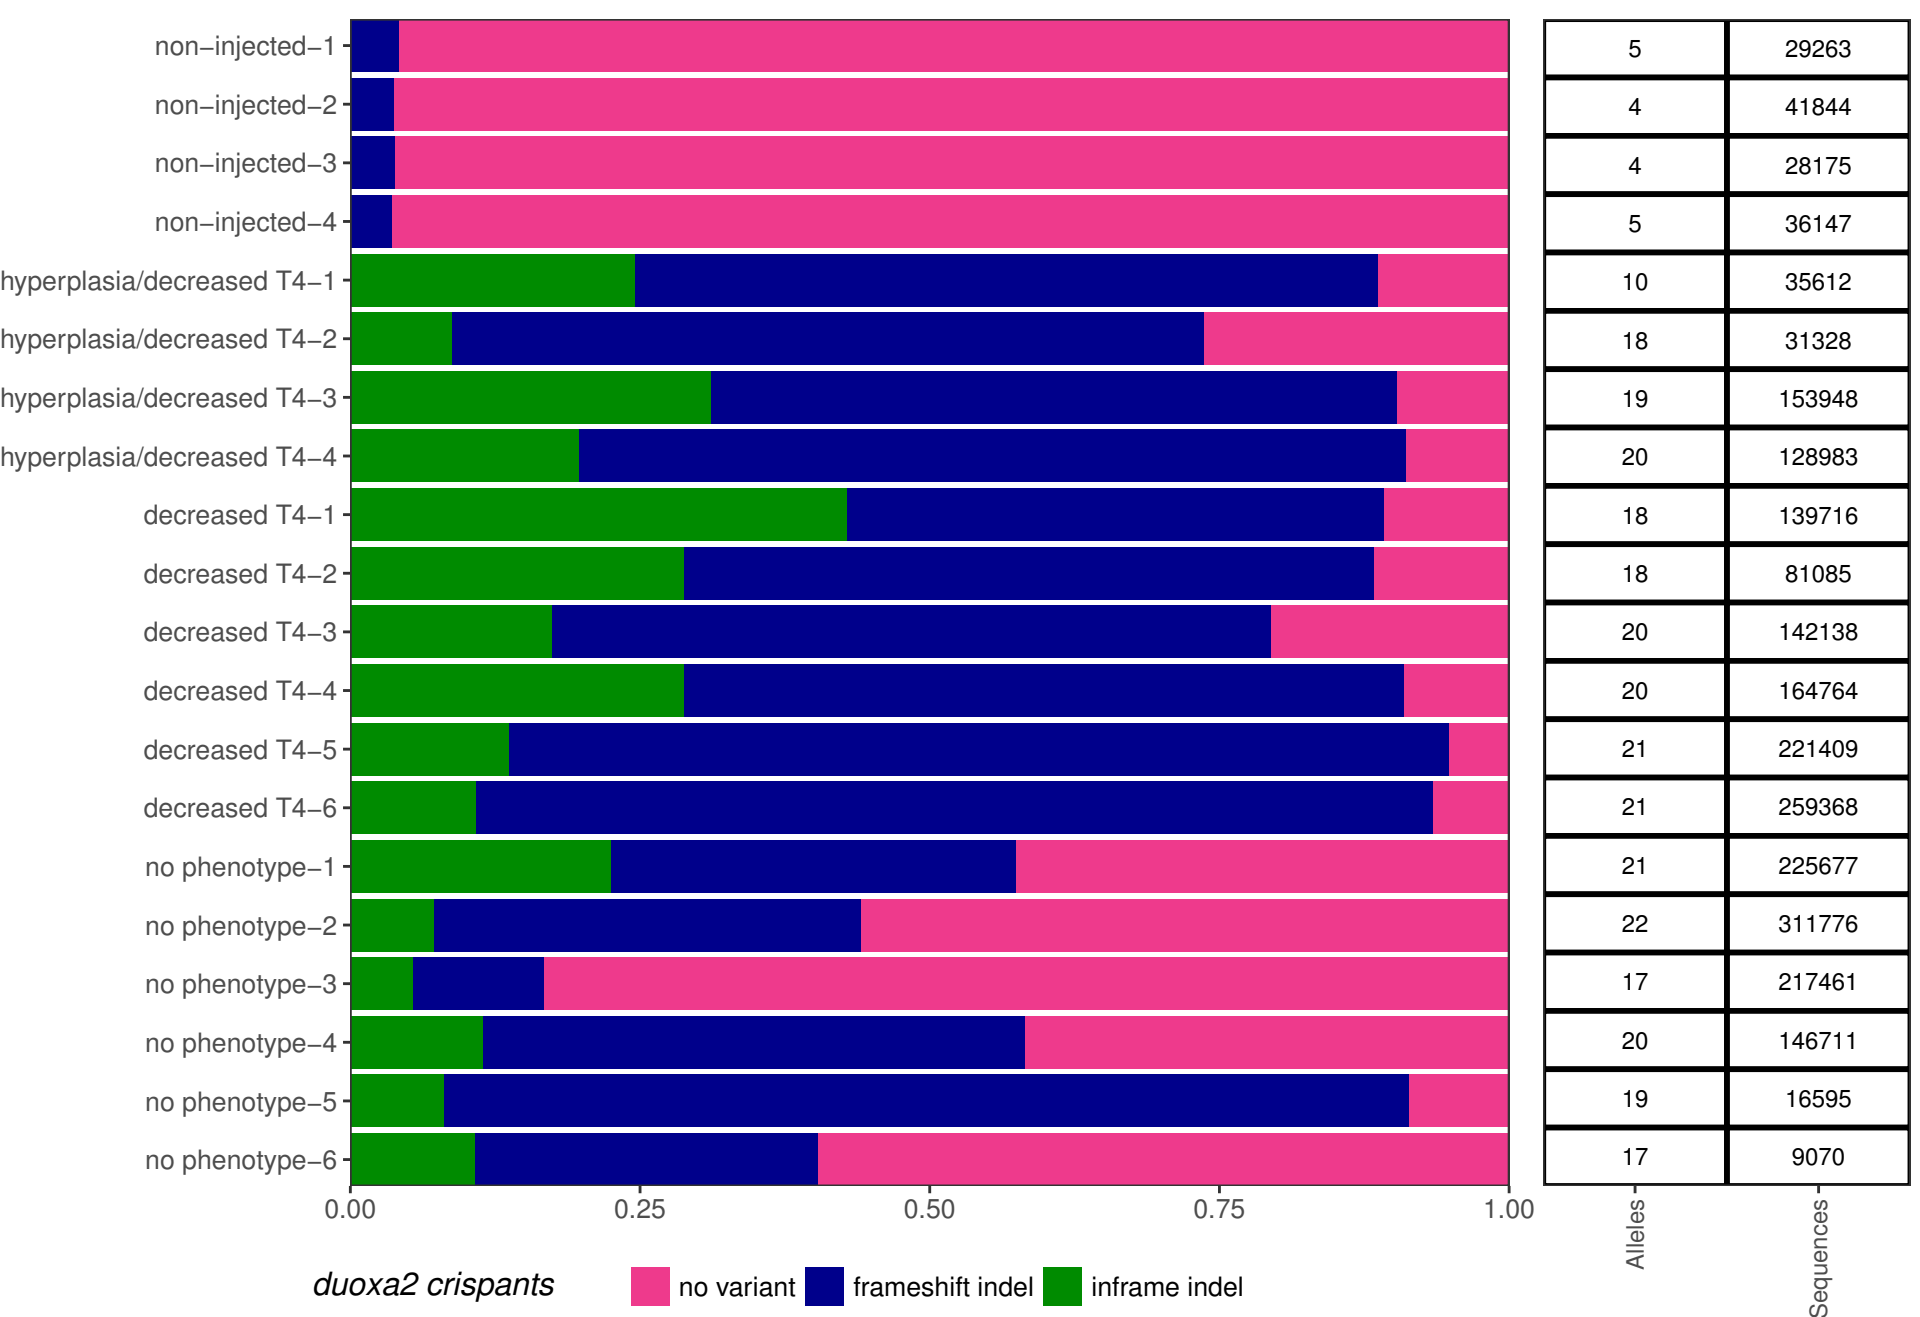

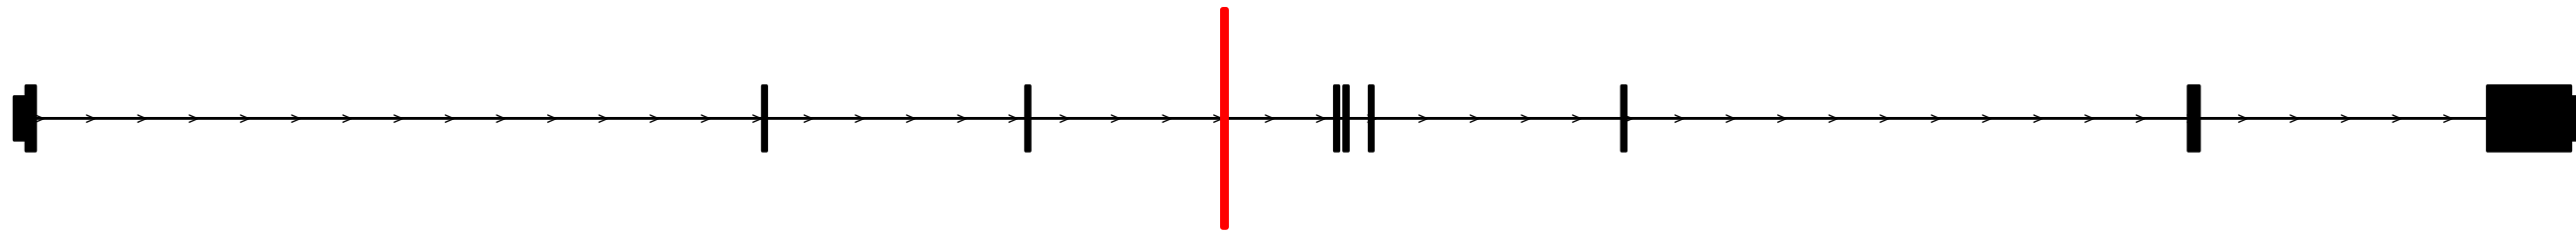

6000000

6010000

6020000

6030000

| Reference    | 499879 | 500203 | 436252 | 497851 | 75465 | 62222 | 58785 | 50069 | 125958 | 62143 | 62034 | 52992 | 56005 | 62953 | 55345 |
|--------------|--------|--------|--------|--------|-------|-------|-------|-------|--------|-------|-------|-------|-------|-------|-------|
| no variant   | 425525 | 425110 | 361955 | 401255 | 1035  | 1128  | 382   | 654   | 3886   | 1305  | 32635 | 27039 | 34305 | 55718 | 543   |
| SNV:-2,-1    | 1631   | 506    | 2253   | 1776   | 250   | 104   | 123   | 55    | 346    | 490   | 886   | 336   | 147   | 75    | 5327  |
| SNV:-1,2     | 2090   | 2034   | 1845   | 928    | 4034  | 85    | 71    | 44    | 288    | 279   | 128   | 90    | 170   | 109   | 997   |
| SNV:-1,1,2,3 | 0      | 0      | 0      | 1      | 0     | 0     | 0     | 4264  | 30     | 0     | 0     | 0     | 0     | 0     | 0     |
| -5:4D        | 15533  | 16508  | 12372  | 22864  | 24313 | 13256 | 3860  | 5821  | 56139  | 23356 | 8585  | 7464  | 6101  | 1043  | 10042 |
| -5:5D        | 7977   | 9494   | 10538  | 11552  | 2235  | 1299  | 20594 | 783   | 2215   | 1212  | 2013  | 1338  | 1275  | 896   | 1088  |
| -3:6D        | 3627   | 3546   | 5102   | 5380   | 4966  | 504   | 203   | 15428 | 1297   | 2394  | 1503  | 932   | 787   | 278   | 9151  |
| -8:8D        | 3992   | 5308   | 5173   | 5423   | 5111  | 1896  | 219   | 4905  | 1109   | 5396  | 1092  | 941   | 968   | 375   | 1941  |
| -2:1D        | 1428   | 2030   | 2127   | 3037   | 3418  | 10300 | 485   | 160   | 1414   | 2195  | 2112  | 1104  | 2161  | 172   | 1895  |
| -10:11,-6:6D | 0      | 0      | 0      | 0      | 1     | 0     | 0     | 1     | 31482  | 0     | 0     | 0     | 0     | 0     | 0     |
| -1:7D        | 166    | 237    | 0      | 0      | 200   | 4     | 22189 | 1722  | 89     | 733   | 13    | 242   | 153   | 35    | 0     |
| -4:4I        | 194    | 71     | 317    | 68     | 1219  | 8417  | 54    | 42    | 93     | 660   | 127   | 167   | 161   | 52    | 26    |
| -1:5I        | 253    | 0      | 0      | 346    | 0     | 32    | 0     | 0     | 49     | 414   | 130   | 65    | 48    | 0     | 10027 |
| -2:8D        | 430    | 0      | 0      | 0      | 258   | 44    | 18    | 0     | 2868   | 6282  | 71    | 263   | 80    | 56    | 31    |
| -5:3D        | 2      | 2      | 0      | 1      | 648   | 7929  | 0     | 0     | 73     | 1     | 1     | 35    | 37    | 1     | 361   |
| -5:11D       | 362    | 0      | 0      | 541    | 94    | 6299  | 27    | 9     | 0      | 265   | 37    | 78    | 20    | 25    | 137   |
| -2:9I        | 0      | 123    | 338    | 876    | 124   | 35    | 5     | 4991  | 0      | 0     | 14    | 0     | 24    | 0     | 0     |
| -2:19I       | 0      | 0      | 0      | 0      | 0     | 0     | 0     | 4660  | 0      | 32    | 1     | 0     | 0     | 0     | 0     |
| -6:11D       | 0      | 0      | 0      | 0      | 4520  | 13    | 0     | 25    | 0      | 0     | 0     | 6     | 0     | 0     | 0     |
| -4:3I,2:1D   | 0      | 0      | 0      | 0      | 0     | 4247  | 0     | 0     | 0      | 0     | 0     | 0     | 0     | 0     | 0     |
| -2:6I,1:3I   | 0      | 0      | 0      | 0      | 1     | 0     | 0     | 0     | 0      | 3839  | 0     | 0     | 1     | 0     | 0     |
| -1:22I       | 1      | 0      | 0      | 0      | 0     | 0     | 3180  | 0     | 0      | 0     | 0     | 0     | 155   | 0     | 14    |

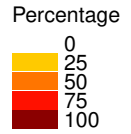

- AAAAAAGTGG, CTTGACATT
- ATT
- TGA
- ◆ CTTAT, TTTTA
- ◆ CATT, TAAA
- ◆ TATAAGGATTTAAGAATC
- ▼ GAGGAT
- ▼ 22I
- ▼ G

non-injected-1    non-injected-2    non-injected-3    non-injected-4    hypoplasia/low T4-1    hypoplasia/low T4-2    hypoplasia/low T4-3    hypoplasia/low T4-4    hypoplasia/low T4-5    hypoplasia/low T4-6    no phenotype-1    no phenotype-2    no phenotype-3    no phenotype-4    no phenotype-5

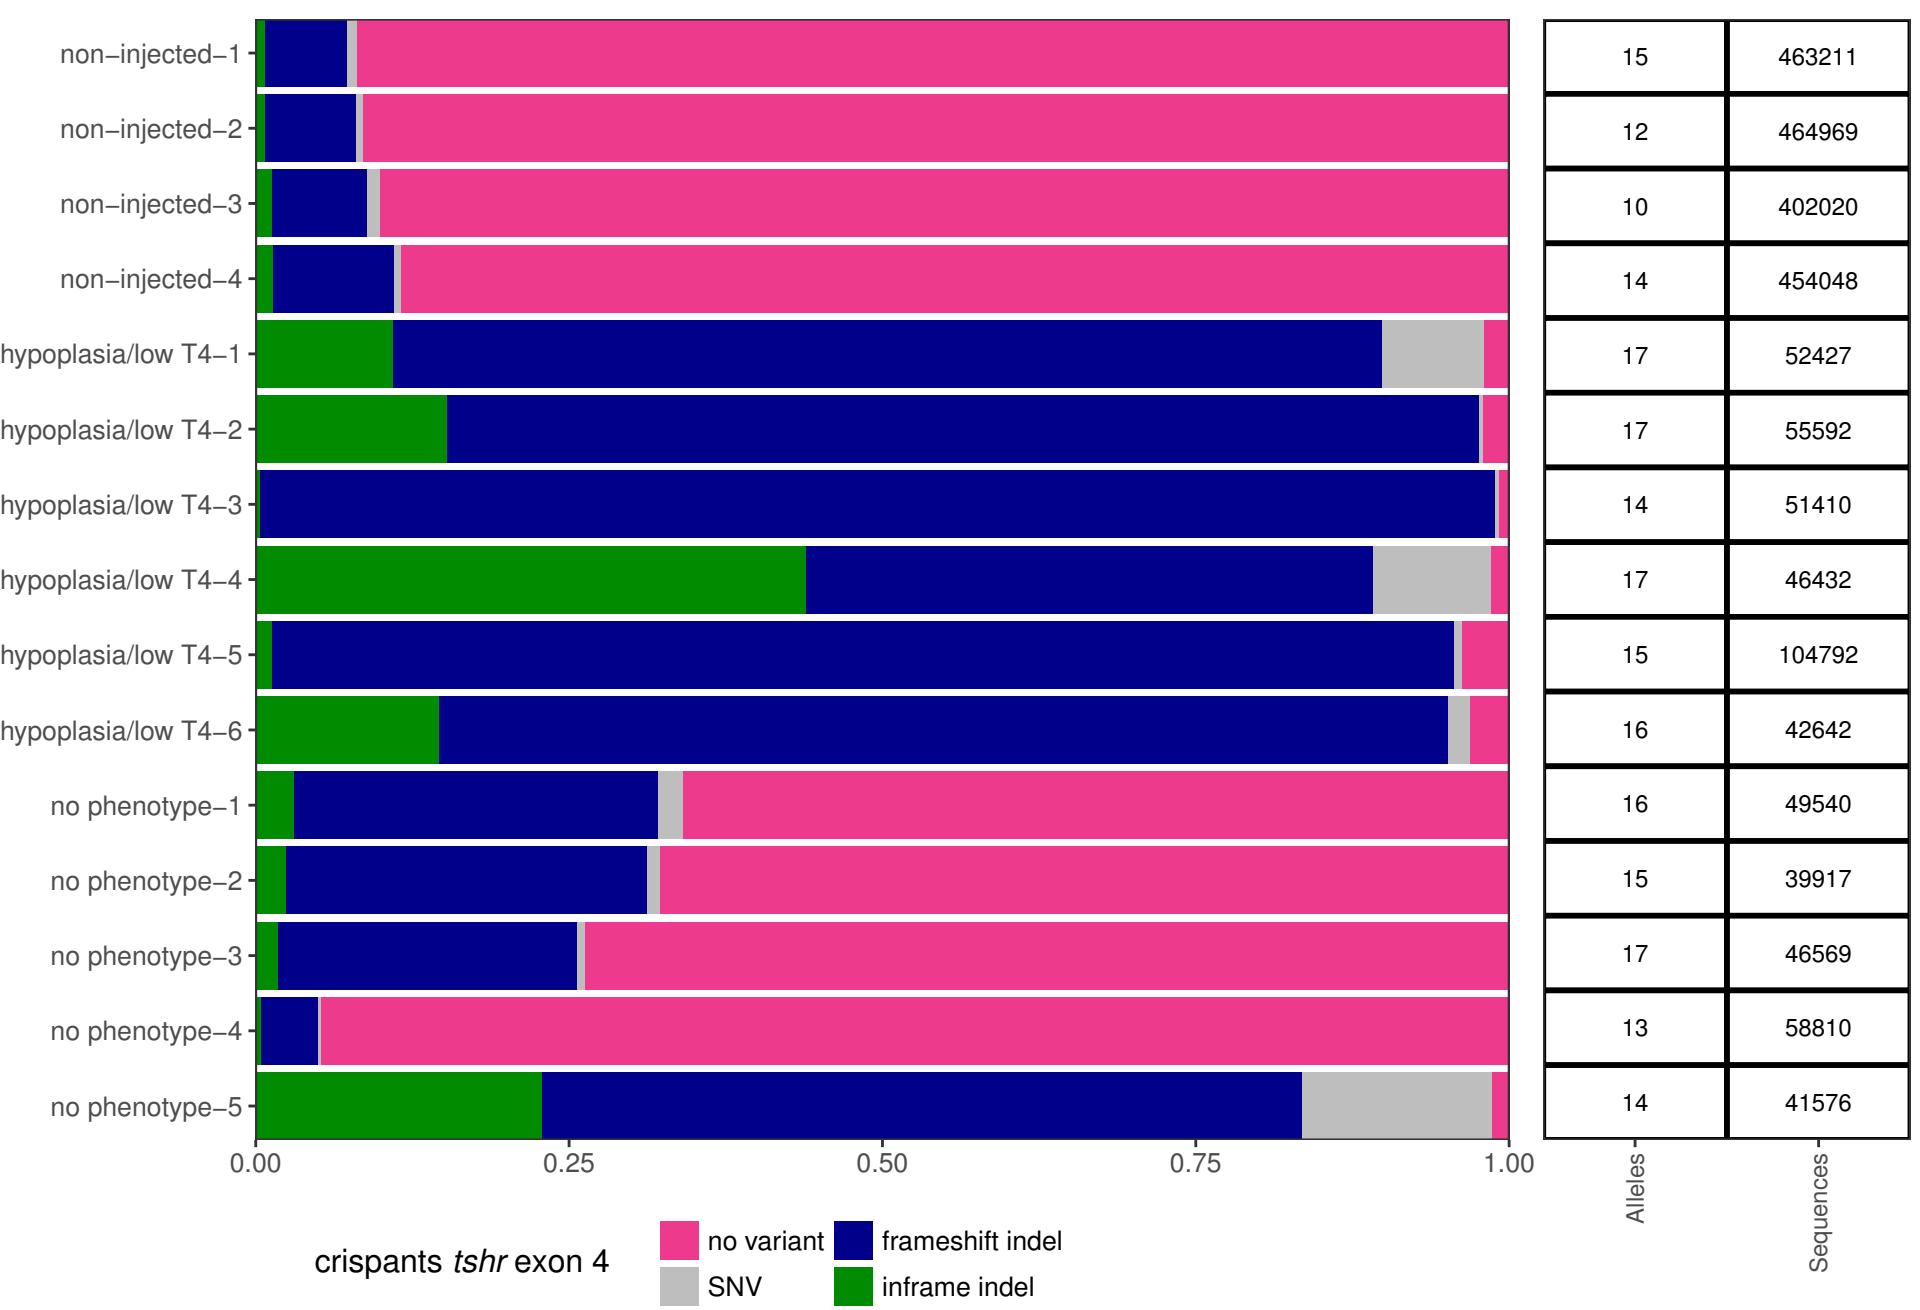



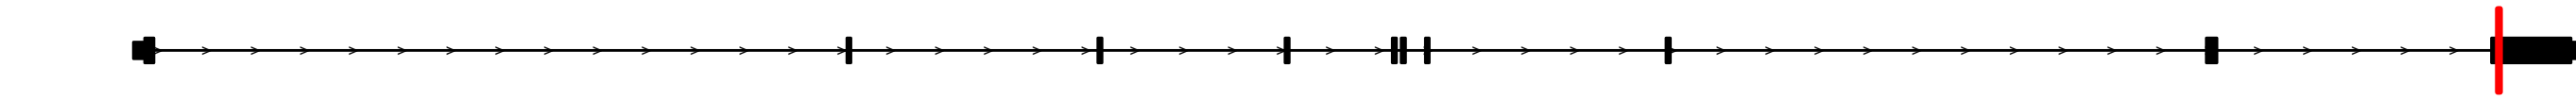

6000000 6010000 6020000 6030000

| Reference   | C T G G T G A T C A T A G G T G T C T C T G A A G A G G T T A T C A C T C A A G T C G A T | 47322 | 51783 | 22322 | 41406 | 57495 | 79028 | 85456 | 47452 | 35628 | 41396 | 76936 | 84196 | 167506 | 84742 | 50756 | 44282 |
|-------------|-------------------------------------------------------------------------------------------|-------|-------|-------|-------|-------|-------|-------|-------|-------|-------|-------|-------|--------|-------|-------|-------|
| no variant  | C T G G T G A T C A T A G G T G T C T C T G A A G A G G T T A T C A C T C A A G T C G A T | 45426 | 49665 | 21456 | 39854 | 3558  | 7825  | 8353  | 19695 | 8394  | 2564  | 74301 | 81760 | 89887  | 58157 | 36373 | 14158 |
| SNV:-1      | C T G G T G A T C A T A G G T G T C T C T C A A G A G G T T A T C A C T C A A G T C G A T | 36    | 78    | 24    | 22    | 308   | 404   | 6183  | 232   | 269   | 1     | 51    | 49    | 348    | 54    | 28    | 867   |
| 2:3D        | C T G G T G A T C A T A G G T G T C T C T G A - - - G G T T A T C A C T C A A G T C G A T | 2     | 0     | 0     | 0     | 9573  | 1083  | 2400  | 3529  | 1065  | 2006  | 0     | 1     | 15735  | 4517  | 2174  | 1842  |
| -7:14D      | C T G G T G A T C A T A G G T - - - - - T A T C A C T C A A G T C G A T                   | 0     | 1     | 0     | 3     | 4872  | 3723  | 609   | 1523  | 5359  | 913   | 0     | 0     | 4512   | 3191  | 1259  | 2201  |
| 1:5D        | C T G G T G A T C A T A G G T G T C T C T G - - - - G T T A T C A C T C A A G T C G A T   | 0     | 0     | 0     | 0     | 4990  | 483   | 12093 | 1901  | 973   | 829   | 0     | 0     | 1686   | 58    | 1205  | 1604  |
| 1:25I       | C T G G T G A T C A T A G G T G T C T C T G A A G A G G T T A T C A C T C A A G T C G A T | 0     | 0     | 0     | 0     | 0     | 25473 | 14    | 84    | 0     | 0     | 0     | 0     | 0      | 0     | 0     | 0     |
| -12:13D     | C T G G T G A T C A - - - - - A G A G G T T A T C A C T C A A G T C G A T                 | 0     | 0     | 0     | 0     | 2563  | 36    | 237   | 1368  | 7     | 14222 | 0     | 0     | 491    | 23    | 220   | 101   |
| -4:4D       | C T G G T G A T C A T A G G T G T C - - - A A G A G G T T A T C A C T C A A G T C G A T   | 1     | 0     | 0     | 0     | 3081  | 7013  | 6767  | 59    | 311   | 1154  | 1     | 0     | 278    | 62    | 0     | 3     |
| -2:2D       | C T G G T G A T C A T A G G T G T C T C - - A A G A G G T T A T C A C T C A A G T C G A T | 1     | 0     | 0     | 0     | 181   | 4342  | 1091  | 232   | 57    | 0     | 0     | 0     | 1266   | 1342  | 66    | 798   |
| 4:8I        | C T G G T G A T C A T A G G T G T C T C T C A A G A G G T T A T C A C T C A A G T C G A T | 0     | 0     | 0     | 0     | 8     | 7599  | 1     | 0     | 0     | 0     | 0     | 0     | 54     | 0     | 22    | 3     |
| 2:2I        | C T G G T G A T C A T A G G T G T C T C T G A A K A G G T T A T C A C T C A A G T C G A T | 0     | 0     | 0     | 0     | 65    | 70    | 4343  | 55    | 70    | 114   | 52    | 0     | 235    | 68    | 650   | 533   |
| -2:3D,8:6I  | C T G G T G A T C A T A G G T G T C T C - - A T A G G T T A T C A C T C A A G T C G A T   | 0     | 0     | 0     | 0     | 0     | 0     | 4314  | 0     | 0     | 0     | 0     | 0     | 0      | 0     | 0     | 0     |
| -6:9I,-4:4D | C T G G T G A T C A T A G G T G T C - - - A A G A G G T T A T C A C T C A A G T C G A T   | 0     | 0     | 0     | 0     | 0     | 0     | 4308  | 0     | 0     | 0     | 0     | 0     | 0      | 0     | 0     | 0     |
| -3:11D      | C T G G T G A T C A T A G G T G T C T - - - A T C A C T C A A G T C G A T                 | 0     | 0     | 0     | 0     | 0     | 0     | 1     | 64    | 3230  | 2     | 0     | 0     | 0      | 0     | 0     | 1     |
| -4:1I       | C T G G T G A T C A T A G G T G T T T C A T A G G A G G T T A T C A C T C A A G T C G A T | 0     | 0     | 0     | 0     | 0     | 0     | 0     | 0     | 2531  | 0     | 0     | 0     | 0      | 11    | 0     | 0     |
| -22:22D     | - - - - - A A G A G G T T A T C A C T C A A G T C G A T                                   | 0     | 0     | 0     | 0     | 0     | 0     | 1     | 0     | 2461  | 0     | 0     | 0     | 0      | 0     | 0     | 0     |

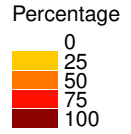

- A
- ▼ GTCTCT
- ◆ TCGATGAG
- ◆ AAACGGTGA
- GA, TA, TC
- ▼ 25I

non-injected-1 non-injected-2 non-injected-3 non-injected-4  
 hypoplasia/decreased T4-1 hypoplasia/decreased T4-2 hypoplasia/decreased T4-3 hypoplasia/decreased T4-4 hypoplasia/decreased T4-5 hypoplasia/decreased T4-6  
 no phenotype-1 no phenotype-2 no phenotype-3 no phenotype-4 no phenotype-5 no phenotype-6

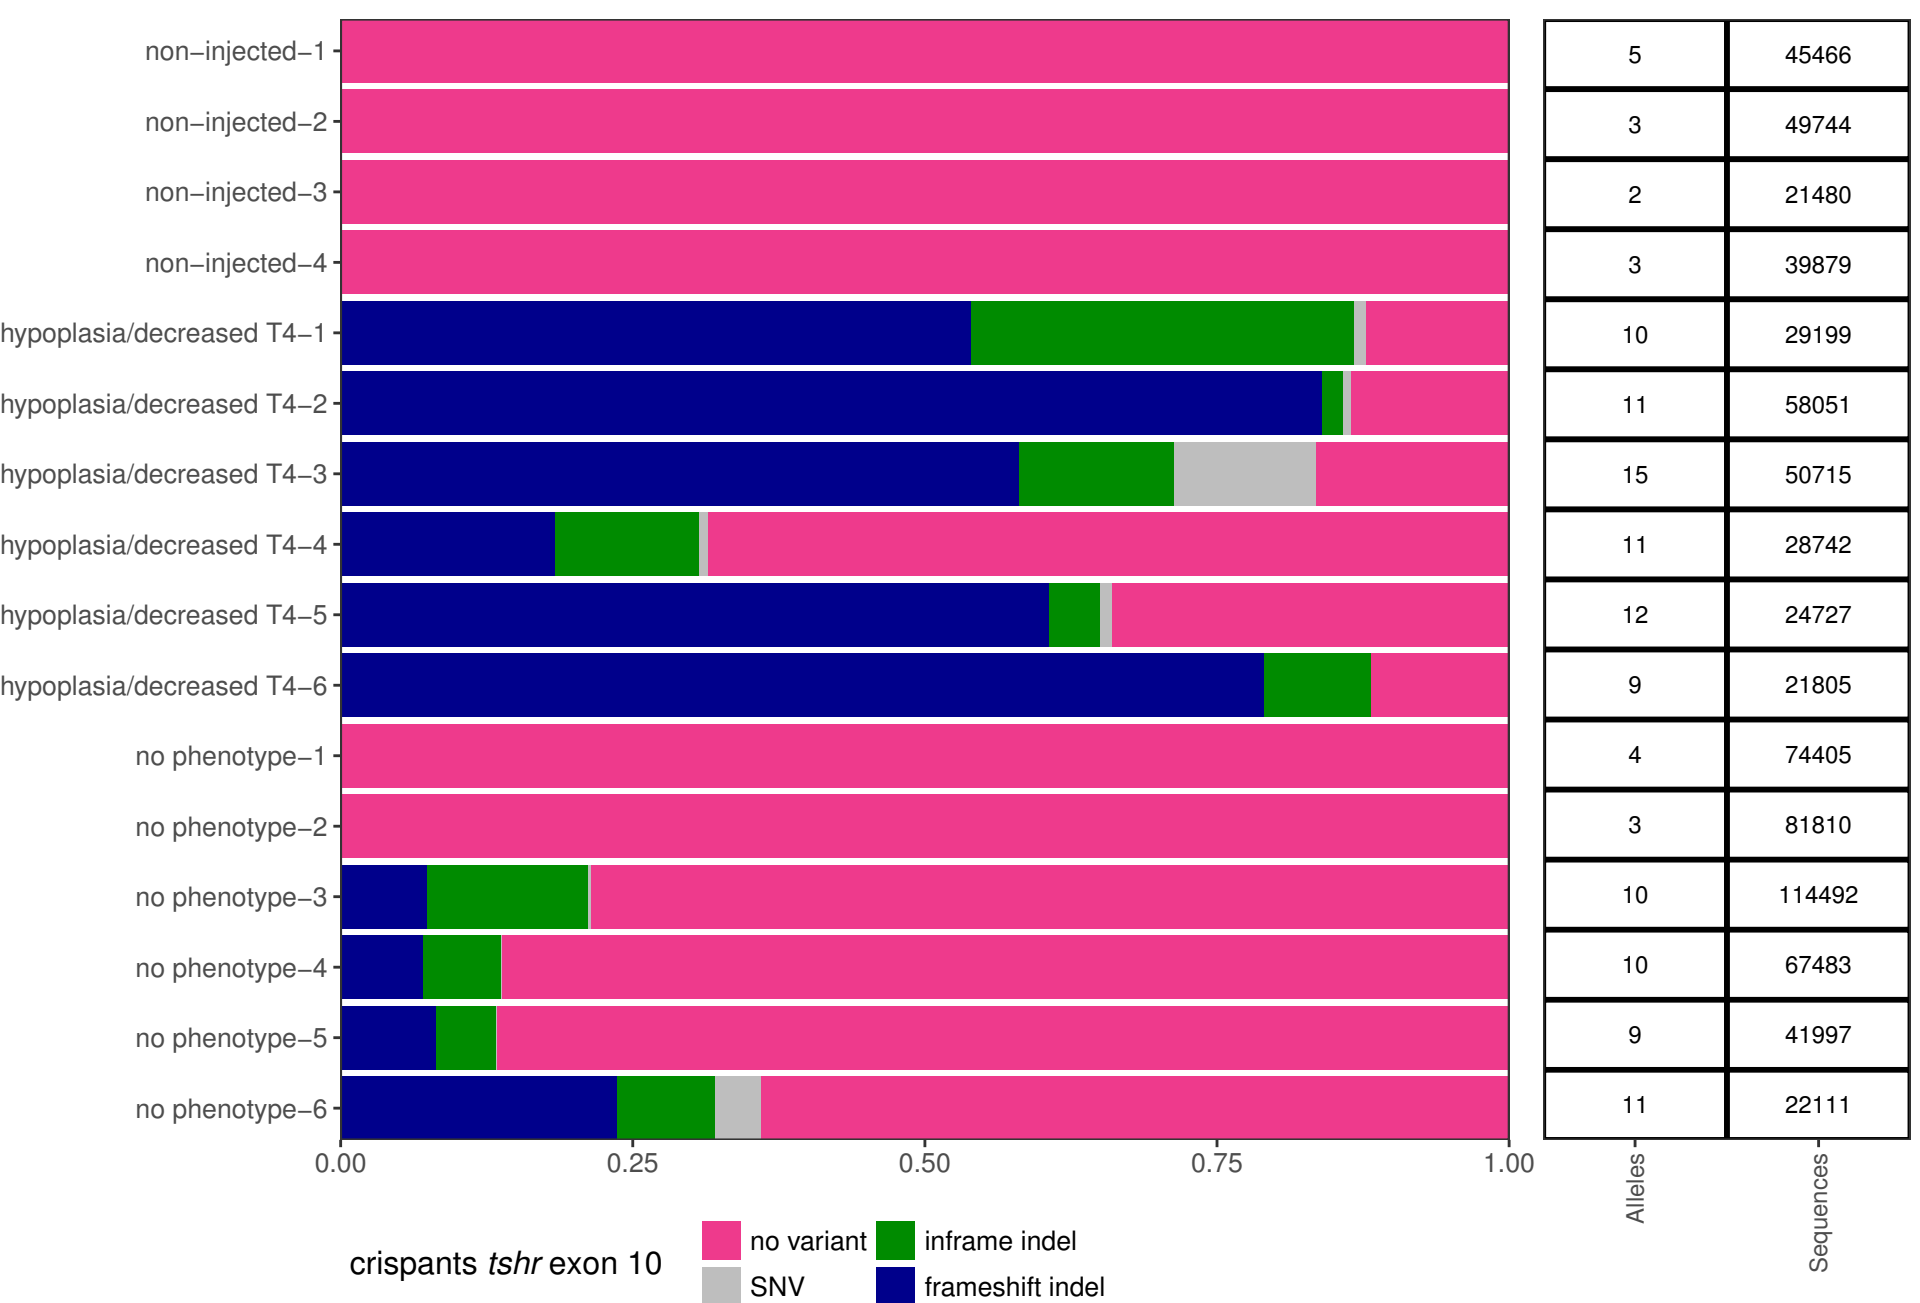

**Hiseq sequencing data tables and reads statistic.**

A)

|    |    |    |    |
|----|----|----|----|
|    |    | e) |    |
| i) | h) | f) | a) |
|    |    |    | b) |
|    |    | g) | c) |
|    |    |    | d) |

B)

|        |           |                |        |
|--------|-----------|----------------|--------|
|        |           | nkx2.4b<br>ex1 |        |
| pool 1 | barcode 1 | 27634          | 311923 |
|        |           |                | 290449 |
|        |           | 10%            | 284435 |
|        |           |                | 6014   |

- A) Scheme representing the organisation of the data tables: a) Raw number of total reads pairs generated during Hiseq sequencing experiment. b) Number of sequences extracted from the raw data and used for analysis. c) Number of sequences successfully mapped on the genomic regions of interest. d) Number sequences unsuccessfully mapped on the genomic regions of interest. e) Genomic region of interest. f) Number of mapped reads corresponding to the genomic region of interest in (e). g) Proportion of a specific genomic region mapped reads on the total of Hiseq sequencing run reads. h) Barcode library reference for a specific set of samples. i) Hiseq sequencing run reference.
- B) This example coming from the 1st barcode library generated and used in the first run of NGS experiment illustrates how one can read the data tables presented here. This NGS run generated 311923 reads, among those, 290449 could be used for analysis. Analysis showed that 284435 reads were mapped on the different regions of interest while 6014 could not be mapped. Out of those 284435 mapped reads 27634 could be mapped on the nkx2.4b exon1 targeted region. This number represents around 10% of the mapped reads from this experiment.

**Important note on the analysis:**

- 1) Note that the number of mapped reads reported in the following tables might be slightly higher than the total number of reads reported in CrispRVariant plots (first row). This is due to CrispRVariant analyses that excludes reads that do not fully span the target window used to summarize mutations for a given amplicon.
- 2) Note that the sum of the mapped reads might be slightly lower than the total number of mapped reads. This is due to off-target reads that could be mapped on the genome of the zebrafish but not on any of our genomic regions of interest.

|                                |          | <i>nkx2.4b</i> | <i>nkx2.4b</i> | <i>pax2a</i> | <i>Duox</i> | <i>duoxa</i> | <i>tshr</i> | <i>tshr</i> | Unrelated genes |        |        |
|--------------------------------|----------|----------------|----------------|--------------|-------------|--------------|-------------|-------------|-----------------|--------|--------|
|                                |          | ex1            | ex2            |              | ex23        | ex2          | ex10        | ex4         |                 |        |        |
| HiSeq sequencing pool number 1 | barcode1 | 27634          | 31620          | 26897        | 31979       | 30837        | 47331       | N/A         | 87680           | 311923 | 290449 |
|                                |          | 10%            | 11%            | 9%           | 11%         | 11%          | 17%         | N/A         | 31%             | 284435 | 6014   |
|                                | barcode2 | 34248          | 42630          | 45534        | 44827       | 44120        | 51791       | N/A         | 103777          | 383709 | 369209 |
|                                |          | 9%             | 12%            | 12%          | 12%         | 12%          | 14%         | N/A         | 28%             | 367165 | 2044   |
|                                | barcode3 | 18827          | 22136          | 30775        | 41469       | 29698        | 22327       | N/A         | 79966           | 251393 | 246266 |
|                                |          | 8%             | 9%             | 13%          | 17%         | 12%          | 9%          | N/A         | 33%             | 245383 | 883    |
|                                | barcode4 | 20309          | 30839          | 35138        | 31209       | 37855        | 41416       | N/A         | 94699           | 305698 | 294573 |
|                                |          | 7%             | 11%            | 12%          | 11%         | 13%          | 14%         | N/A         | 32%             | 291627 | 2946   |
|                                | barcode5 | N/A            | N/A            | N/A          | N/A         | 39548        | N/A         | N/A         | 237629          | 300855 | 279833 |
|                                |          | N/A            | N/A            | N/A          | N/A         | 14%          | N/A         | N/A         | 86%             | 277513 | 2320   |
|                                | barcode6 | N/A            | N/A            | N/A          | N/A         | 47499        | N/A         | N/A         | 372064          | 517319 | 464391 |
|                                |          | N/A            | N/A            | N/A          | N/A         | 11%          | N/A         | N/A         | 87%             | 428781 | 35610  |
|                                | barcode7 | N/A            | N/A            | N/A          | N/A         | 19555        | N/A         | N/A         | 146163          | 178411 | 168333 |
|                                |          | N/A            | N/A            | N/A          | N/A         | 12%          | N/A         | N/A         | 88%             | 166187 | 2146   |
|                                | barcode8 | N/A            | N/A            | N/A          | N/A         | 11929        | N/A         | N/A         | 82630           | 104141 | 97050  |
|                                |          | N/A            | N/A            | N/A          | N/A         | 13%          | N/A         | N/A         | 87%             | 94703  | 2347   |

|                                |          | <i>nkx2.4b</i><br>ex1 | <i>nkx2.4b</i><br>ex2 | <i>pax2a</i> | <i>Duox</i><br>ex23 | <i>duoxa</i><br>ex2 | <i>tshr</i><br>ex10 | <i>tshr</i> ex4 | Unrelated<br>genes |         |
|--------------------------------|----------|-----------------------|-----------------------|--------------|---------------------|---------------------|---------------------|-----------------|--------------------|---------|
| HiSeq sequencing pool number 2 | barcode1 | 167333                | 157614                | 158825       | 113132              | 241650              | 66333               | N/A             | 574859             | 1515679 |
|                                |          | 11%                   | 11%                   | 11%          | 8%                  | 16%                 | 4%                  | N/A             | 39%                | 1483691 |
|                                | barcode2 | 118677                | 103410                | 119374       | 60543               | 185064              | 80453               | N/A             | 560086             | 1480170 |
|                                |          | 10%                   | 8%                    | 10%          | 5%                  | 15%                 | 7%                  | N/A             | 46%                | 3521    |
|                                | barcode3 | 141879                | 153593                | 134503       | 54679               | 185980              | 94678               | N/A             | 570641             | 1251645 |
|                                |          | 11%                   | 11%                   | 10%          | 4%                  | 14%                 | 7%                  | N/A             | 43%                | 1230863 |
|                                | barcode4 | 61284                 | 75101                 | 94298        | 73743               | 143437              | 48962               | N/A             | 362124             | 1227690 |
|                                |          | 7%                    | 9%                    | 11%          | 9%                  | 17%                 | 6%                  | N/A             | 42%                | 3173    |
|                                | barcode5 | 132492                | 160579                | 180481       | 97663               | 203510              | 37577               | N/A             | 525620             | 887505  |
|                                |          | 10%                   | 12%                   | 13%          | 7%                  | 15%                 | 3%                  | N/A             | 39%                | 861800  |
|                                | barcode6 | 162274                | 138317                | 160662       | 194754              | 256055              | 43682               | N/A             | 547955             | 859002  |
|                                |          | 11%                   | 9%                    | 11%          | 13%                 | 17%                 | 3%                  | N/A             | 36%                | 2798    |
| barcode7                       | 233132   | 222020                | 94298                 | 336642       | 329571              | 76950               | N/A                 | 861336          | 1358958            |         |
|                                | 10%      | 10%                   | 4%                    | 14%          | 14%                 | 3%                  | N/A                 | 37%             | 1340590            |         |
| barcode8                       | 230917   | 170524                | 132492                | 264755       | 359011              | 84203               | N/A                 | 919718          | 1338015            |         |
|                                | 10%      | 7%                    | 6%                    | 12%          | 16%                 | 4%                  | N/A                 | 40%             | 2575               |         |
| barcode9                       | 250798   | 254568                | 97663                 | 194652       | 318695              | 170679              | N/A                 | 944916          | 1530808            |         |
|                                | 10%      | 11%                   | 4%                    | 8%           | 13%                 | 7%                  | N/A                 | 39%             | 1508150            |         |
| barcode10                      | 285564   | 300872                | 202930                | 184546       | 412454              | 84971               | N/A                 | 1058048         | 1503778            |         |
|                                | 11%      | 12%                   | 8%                    | 7%           | 16%                 | 3%                  | N/A                 | 40%             | 4372               |         |
| barcode11                      | 150956   | 153261                | 44130                 | 103825       | 247152              | 50893               | N/A                 | 571775          | 2382353            |         |
|                                | 10%      | 10%                   | 3%                    | 7%           | 17%                 | 3%                  | N/A                 | 39%             | 2337036            |         |
| barcode12                      | 128164   | 205185                | 160662                | 128456       | 220169              | 46332               | N/A                 | 501095          | 2330502            |         |
|                                | 9%       | 15%                   | 12%                   | 9%           | 16%                 | 3%                  | N/A                 | 36%             | 6534               |         |



## NGS ORF alignments

*pax2a* exon 2 HiSeq sequencing most frequent alleles alignment:

```
a) ref rna: ATG|GAT|ATT|CAC|TGC|AAA|GCA|GAC|CCC|TTC|TCG|GCG|ATG|CAC|CGG|CAC|GGC|GGT|GTG|AAC|CAG|CTA|GGA|GGG|GTG|TTT|GTG|AAT|GGC|AGA|CCC|CTA|CCT|GAC|GTG|GTC|AGG|CAA|
ref aa:  M  D  I  H  C  K  A  D  P  F  S  A  M  H  R  H  G  G  V  N  Q  L  G  G  V  F  V  N  G  R  P  L  P  D  V  V  R  Q
1) mut rna: ATG|GAT|ATT|CAC|TGC|AAA|GCA|GAC|CCC|TTC|TCG|GCG|ATG|CAC|CGG|CAC|GGC|GGT|GTG|AAC|CAG|GAG|GGG|TGT|TTG|TGA
mut aa:  M  D  I  H  C  K  A  D  P  F  S  A  M  H  R  H  G  G  V  N  Q  E  G  C  L  *
2) mut rna: ATG|GAT|ATT|CAC|TGC|AAA|GCA|GAC|CCC|TTC|TCG|GCG|ATG|CAC|CGG|CAC|GGC|GGT|GTG|AAC|CAG|GGG|TGT|TTG|TGA
mut aa:  M  D  I  H  C  K  A  D  P  F  S  A  M  H  R  H  G  G  V  N  Q  G  C  L  *
3) mut rna: ATG|GAT|ATT|CAC|TGC|AAA|GCA|GAC|CCC|TTC|TCG|GCG|ATG|CAC|CGG|CAC|GGC|GGT|GTG|AAC|CAG|CTT|AGG|AGG|GGT|GTT|TGT|GAA|TGG|CAG|ACC|CCT|ACC|TGA
mut aa:  M  D  I  H  C  K  A  D  P  F  S  A  M  H  R  H  G  G  V  N  Q  L  R  R  G  V  C  E  W  Q  T  P  T  *
```

- a) Reference transcript (ENSDARG00000028148).
- 1) Deletion of 4nt (AGCT). Occurrence: 14-50%.
- 2) Deletion of 7nt (CAGCTAGG). Occurrence: 1-13%.
- 3) Insertion of 1nt (T). Occurrence: 1-6%.

### *tshr* exon 4 HiSeq sequencing most frequent alleles alignment:

```
a) ref rna:...AAG|CTG|ACA|TTC|ATC|CAC|CCA|GAG|GCT|TTT|AAG|AAT|CTC|CCT|AAT|TTA|CAG|TAT|CTA|GGA|TTA|TTC|AAC| ...
ref aa: ...K L T F I H P E A F K N L P N L Q Y L G L F N ...
1) mut rna:...AAG|CTG|ACA|TTC|ATC|CAG|AGG|CTT|TTA|AGA|ATC|TCC|CTA|ATT|TAC|AGT|ATC|TAG
mut aa: ...K L T F I Q R L L R I S L I Y S I *
2) mut rna:...AAG|CTG|ACA|TTC|ATC|AGA|GGC|TTT|TAA
mut aa: ... K L T F I R G F *
3) mut rna:...AAG|CTG|ACA|TTC|ATC|CAC|CAT|TTA|AGA|ATC|TCC|CTA|ATT|TAC|AGT|ATC|TAG
mut aa: ... K L T F I H H L R I S L I Y S I *
```

- a) Reference transcript (ENSDARG00000037195).
- 1) Deletion of 4nt (CCAC). Occurrence: 6.6-44.6%.
- 2) Deletion of 5nt (CCACC). Occurrence: 1.6-35%.
- 3) Deletion of 7nt (CCAGAGG). Occurrence: 0-37.8%.

### *tshr* exon 10 HiSeq sequencing most frequent alleles alignment:

```
a) ref rna:... TTG|AGT|GAT|AAC|CTC|TTC|AGA|GAC|ACC|TAT|GAT|CAC|CAG|GAG|TTT|TTC|GGC|AAC|GGA|CAT|TAT|CCC|ACT|TAT|TTT|GAC|AGA|CAT|GCA|GAT|GAG|AAC|ATG|GGT|TTC|GGT...
ref aa: ... L S D N L F R D T Y D H Q E F F G N G H Y P T Y F D R H A D E N M G F G ...
1) mut rna:... TTG|AGT|GAT|AAC|CTC| |AGA|GAC|ACC|TAT|GAT|CAC|CAG|GAG|TTT|TTC|GGC|AAC|GGA|CAT|TAT|CCC|ACT|TAT|TTT|GAC|AGA|CAT|GCA|GAT|GAG|AAC|ATG|GGT|TTC|GGT...
mut aa: ... L S D N L R D T Y D H Q E F F G N G H Y P T Y F D R H A D E N M G F G ...
2) mut rna:... TTG|AGT|GAT|AAC|CTA|TGA
mut aa: ... L S D N L *
3) mut rna:... TTG|AGT|GAT|AAC|CAG|AGA|CAC|CTA|TGA
mut aa: ... L S D N Q R H L *
4) mut rna:... TTG|AGT|GAT|AAC|CTC|TTA|TCA|CTC|AGA|GAC|ACC|TAT|GAT|AAC|CAG|AGA|CAC|CTA|TGA
mut aa: ... L S D N L L S L R D T Y D N Q R H L *
5) mut rna:... TTG|AGT|GAT|AAC|CTC|TTG|ATC|ACC|AGG|AGT|TTT|TCG|GCA|ACG|GAC|ATT|ATC|CCA|CTT|ATT|TTG|ACA|GAC|ATG|CAG|ATG|AGA|ACA|TGG|GTT|TCG|GTG|AAA|CAC|TGA
mut aa: ... L S D N L L I T R S F S A T D I I P L I L T D M Q M R T W V S V K H *
```

- a) Reference transcript (ENSDARG00000037195).
- 1) Deletion of 3nt (TCT), no frameshift induced. Occurrence: 1.4-16.7%.
- 2) Deletion of 14nt (ACCTCTTCAGAGAC). Occurrence: 0.8-15%.
- 3) Deletion of 5nt (CTCTT). Occurrence: 0.6-14.2%.
- 4) Insertion of 25nt (ATCACTCAGAGACACCTATGATAAC). Occurrence: 0-32.2%.
- 5) Deletion of 12nt (TCAGAGACACCTA). Occurrence: 0.1-34.4%



**duox exon 23 HiSeq sequencing most frequent alleles alignment:**

```

a) ref rna:...GTC|ATC|TAC|GCC|ATC|TCC|GCC|GGC|CTC|GCT|TTG|GAA|AGA|TGC|ATC|TAT|TAT|GGT|TTA|CAG|GCT|CAC|TCC|AGT|GGC|ATC|CCA|GAG|ACC|TCT|ATG|GTG|GGT|GTG|TTG|GTG|TCT|CGT
ref aa: ... V I Y A I S A G L A L E R C I Y Y G L Q A H S S G I P E T S M V G V L V S R
ref rna: GGC|TCA|GCG|GCC|GCC|ATT|TCG|TTC|CTG|TTC|CCC|TAC|ATG|CTG|CTG|ACT|GTG|TGC|CGA|AAC| ...
ref aa: G S A A A I S F L F P Y M L L T V C R N ...
1) mut rna: GTC|ATC|TAC|GCC|GGC| |CTC|GCT|TTG|GAA|AGA|TGC|ATC|TAT|TAT|GGT|TTA|CAG|GCT|CAC|TCC|AGT|GGC|ATC|CCA|GAG|ACC|TCT|ATG|GTG|GGT|GTG|TTG|GTG|TCT|CGT
mut aa: V I Y A G L A L E R C I Y Y G L Q A H S S G I P E T S M V G V L V S R
mut rna: GGC|TCA|GCG|GCC|GCC|ATT|TCG|TTC|CTG|TTC|CCC|TAC|ATG|CTG|CTG|ACT|GTG|TGC|CGA|AAC| ...
mut aa: G S A A A I S F L F P Y M L L T V C R N ...
2) mut rna:...GTC|ATC|TAC|GCC|ATC|TCG|CTT|TGG|AAA|GAT|GCA|TCT|ATT|ATG|GTT|TAC|AGG|CTC|ACT|CCA|GTG|GCA|TCC|CAG|AGA|CCT|CTA|TGG|TGG|GTG|TGT|TGG|TGT|CTC|GTG|GCT|CAG|CGG
mut aa: ... V I Y A I S L W K D A S I M V Y R L T P V A S Q R P L W W V C W C L V A Q R
mut rna: CCG|CCA|TTT|CGT|TCC|TGT|TCC|CCT|ACA|TGC|TGC|TGA
mut aa: P P F R S C S P T C C *
3) mut rna:...GTC|ATC|TAC|GCC|ATC|TCG|CCG|GCC|TCG|CTT|TGG|AAA|GAT|GCA|TCT|ATT|ATG|GTT|TAC|AGG|CTC|ACT|CCA|GTG|GCA|TCC|CAG|AGA|CCT|CTA|TGG|TGG|GTG|TGT|TGG|TGT|CTC|GTG
mut aa: ... V I Y A I S P A S L W K D A S I M V Y R L T P V A S Q R P L W W V C W C L V
mut rna: GCT|CAG|CGG|CCG|CCA|TTT|CGT|TCC|TGT|TCC|CCT|ACA|TGC|TGC|TGA
mut aa: A Q R P P F R S C S P T C C *

```

- a) Reference transcript (ENSDARG0000062632)
  - 1) Deletion of 9nt (CGCCATCTC), no frameshift induced. Occurrence: 18-61.9%.
  - 2) Deletion of 10nt (CTCCGCCGGC). Occurrence: 1.5-18.4%
  - 3) Deletion of 1nt (C). Occurrence: 0-18%

**Duoxa (duox2) exon 2 HiSeq sequencing most frequent alleles alignment:**

```

a) ref rna:...GTC|AGT|TTC|CTC|TTC|ATT|CTA|CCG|GGA|ATA|CGT|GGC|AGA|TCG|AGA|TGG|TTT|TGG|ATG|TTC|CGG|ATA|TTC|ATT|AGC|TTA|TTT|ATT|GGA|GTT|GTT|TTA|GTT|GTG|CTT|AAT| ...
ref aa: ... V S F L F I L P G I R G R S R W F W M F R I F I S L F I G V V L V V L N ...
1) mut rna:...GTC|AGT|TTC|CTC|TTC|TAC|CGG|GAA|TAC|GTG|GCA|GAT|CGA|GAT|GGT|TTT|GGA|TGT|TCC|GGA|TAT|TCA|TTA|GCT|TAT|TTA|TTG|GAG|TTG|TTT|TAG
mut aa: ... V S F L F Y R E Y V A D R D G F G C S G Y S L A Y L L E L F *
2) mut rna:...GTC|AGT|TTC|CTC|TAC|CGG|GAA|TAC|GTG|GCA|GAT|CGA|GAT|GGT|TTT|GGA|TGT|TCC|GGA|TAT|TCA|TTA|GCT|TAT|TTA|TTG|GAG|TTG|TTT|TAG
mut aa: ... V S F L Y R E Y V A D R D G F G C S G Y S L A Y L L E L F *
3) mut rna:...GTC|AGT|TTC|CTC| |ATT|CTA|CCG|GGA|ATA|CGT|GGC|AGA|TCG|AGA|TGG|TTT|TGG|ATG|TTC|CGG|ATA|TTC|ATT|AGC|TTA|TTT|ATT|GGA|GTT|GTT|TTA|GTT|GTG|CTT|AAT| ...
mut aa: ... V S F L I L P G I R G R S R W F W M F R I F I S L F I G V V L V V L N ...
4) mut rna:...GTC|AGT|TTC|CTC|TTC|TAT|TCT|ACC|GGG|AAT|ACG|TGG|CAG|ATC|GAG|ATG|GTT|TTG|GAT|GTT|CCG|GAT|ATT|CAT|TAG
mut aa: ... V S F L F Y S T G N T W Q I E M V L D V P D I H *
5) mut rna:...GTC|AGT|TTC|CTC|CTT| |CTA|CCG|GGA|ATA|CGT|GGC|AGA|TCG|AGA|TGG|TTT|TGG|ATG|TTC|CGG|ATA|TTC|ATT|AGC|TTA|TTT|ATT|GGA|GTT|GTT|TTA|GTT|GTG|CTT|AAT| ...
mut aa: ... V S F L L L P G I R G R S R W F W M F R I F I S L F I G V V L V V L N ...

```

- a) Reference transcript (ENSDARG0000078962)
  - 1) Deletion of 4nt (GAAT). Occurrence: 9.9-43.4%.
  - 2) Deletion of 7nt (AGAATGA). Occurrence: 0.6-22.2%.
  - 3) Deletion of 3nt (GAA), no frameshift induced. Occurrence: 4.4-22.1%
  - 4) Insertion of 1nt (T). Occurrence: 0-21.1%.
  - 5) Deletion of 3nt (ATG), no frameshift induced. Occurrence: 0-24.4%.

***nkx2.4b* exon 1 HiSeq sequencing most frequent alleles alignment:**

```

a) Ref rna:... GGC|GCC|ACG|GCC|ACG|GCT|TGG|TAC|GGC|TCG|AAC|CCG|GAG|CCG|AGA|TAC|CCA|ACA|ATC|TCC|AGG|TTT|ATG|GGT|CCC|TCG|GCG|GGC|ATG|AAC|ATG|GGC|ACG|TTA|CCG|GGA|ATG|GAC|GCC|AGT...
ref aa: ... G A T A T A W Y G S N P E P R Y P T I S R F M G P S A G M N M G T L P G M D A S ...
1) mut rna:... GGC|GCC|ACG|GCC|ACG|GTA|CGG|CTC|GAA|CCC|GGA|GCC|GAG|ATA|CCC|AAC|AAT|CTC|CAG|GTT|TAT|GGG|TCC|CTC|GGC|GGG|CAT|GAA|CAT|GGG|CAC|GTT|ACC|GGG|AAT|GGA|CGC|CAG|TAA
mut aa: ... G A T A T V R L E P G A E I P N N L Q V Y G S L G G H E H G H V T G N G R Q *
2) mut rna:... GCC|ACG|GCC|ACG|GCT|CGA|ACC|CGG|AGC|CGA|GAT|ACC|CAA|CAA|TCT|CCA|GGT|TTA|TGG|GTC|CCT|CGG|CGG|GCA|TGA
mut aa: ... A T A T A R T R S R D T Q Q S P G L W V P R R A *
3) mut rna:... AGA|AAC|GGC|GCC|ACG|GTA|CGG|CTC|GAA|CCC|GGA|GCC|GAG|ATA|CCC|AAC|AAT|CTC|CAG|GTT|TAT|GGG|TCC|CTC|GGC|GGG|CAT|GAA|CAT|GGG|CAC|GTT|ACC|GGG|AAT|GGA|CGC|CAG|TAA
mut aa: ... R N G A T V R L E P G A E I P N N L Q V Y G S L G G H E H G H V T G N G R Q *
4) mut rna:... AGA|AAC|GGC|GCC|ACG|GCT|CGA|ACC|CGG|AGC|CGA|GAT|ACC|CAA|CAA|TCT|CCA|GGT|TTA|TGG|GTC|CCT|CGG|CGG|GCA|TGA
mut aa: ... R N G A T A R T R S R D T Q Q S P G L W V P R R A *

```

- a) Reference transcript (ENSDARG00000104107).
- 1) Deletion of 5nt (GGCTT). Occurrence: 6-32.9%.
- 2) Deletion of 10nt (ACGGCTTGGT). Occurrence: 1-20%.
- 3) Deletion of 11nt (GGCCACGGCTT). Occurrence: 0-28.7%.
- 4) Deletion of 16nt (ACGGCCACGGCTTGGT). Occurrence: 2-27.7%.

***nkx2.4b* exon 2 HiSeq sequencing most frequent alleles alignment:**

```

a) ref rna:... CAC|GCG|GCG|CCG|CGC|AGG|AAA|CGG|CGC|GTG|CTT|TTC|TCC|CAA|GCG|CAG|GTA|TAC|GAG|CTG|GAG|CGC|CGC|TTC|AAG|CAG|CAA|AAA|TAC|CTG|TCG|GCC|CCG|GAG|AGG|GAA|CAT|TTG|GCC|AGC|
ref aa: ... H A A P R R K R R V L F S Q A Q V Y E L E R R F K Q Q K Y L S A P E R E H L A S
ref rna: ... ATG|ATC|CAT|CTA|ACC|CCG|ACG|CAG|GTC|AAG|ATC|TGG|TTC|CAG|AAC|CAC|AGG|TAC|AAA|ATG|AAG|CGG|GAG|GCG|AAG|GAT|AAA|GCG|TCC|CAG|CAG|CAG| ...
ref aa: ... M I H L T P T Q V K I W F Q N H R Y K M K R E A K D K A S Q Q Q ...
1) mut rna:... CAC|GCG|GCG|CGT|GCT|TTT|CTC|CCA|AGC|GCA|GGT|ATA|CGA|GCT|GGA|GCG|CCG|CTT|CAA|GCA|GCA|AAA|ATA|CCT|GTC|GGC|CCC|GGA|GAG|GGA|ACA|TTT|GGC|CAG|CAT|GAT|CCA|TCT|AAC|CCC|
mut aa: ... H A A R A F L P S A G I R A G A P L Q A A K I P V G P G E G T F G Q H D P S N P
mut rna: ... GAC|GCA|GGT|CAA|GAT|CTG|GTT|CCA|GAA|CCA|CAG|GTA|CAA|AAT|GAA|GCG|GGA|GGC|GAA|GGA|TAA
mut aa: ... D A G Q D L V P E P Q V Q N E A G G E G *
2) mut rna:... CAC|GCG|GCG|CCG|CGC|AAG|GAA|ACG|GCG|CGT|GCT|TTT|CTC|CCA|AGC|GCA|GGT|ATA|CGA|GCT|GGA|GCG|CCG|CTT|CAA|GCA|GCA|AAA|ATA|CCT|GTC|GGC|CCC|GGA|GAG|GGA|ACA|TTT|GGC|CAG|
mut aa: ... H A A P R K E T A R A F L P S A G I R A G A P L Q A A K I P V G P G E G T F G Q
mut rna: ... CAT|GAT|CCA|TCT|AAC|CCC|GAC|GCA|GGT|CAA|GAT|CTG|GTT|CCA|GAA|CCA|CAG|GTA|CAA|AAT|GAA|GCG|GGA|GGC|GAA|GGA|TAA
mut aa: ... H D P S N P D A A G Q D L V P E P Q V Q N E A G G E G *
3) mut rna:... CAC|GCG|GCG|CCG|TGC|TTT|TCT|CCC|AAG|CGC|AGG|TAT|ACG|AGC|TGG|AGC|GCC|GTC|TCA|AGC|AGC|AAA|AAT|ACC|TGT|CGG|CCC|CGG|AGA|GGG|AAC|ATT|TGG|CCA|GCA|TGA
mut aa: ... H A A P C F S P K R R Y T S W S A A S S S K N T C R P R R R G N I W P A *

```

- a) Reference transcript (ENSDARG00000104107).
- 1) Deletion of 17nt (CGGCGCCGCGCAGGAAA). Occurrence: 8.6-26.7%
- 2) Insertion of 1nt (T). Occurrence: 2.4-12.5%
- 3) Deletion of 16nt (CGGCGAGGAAACGGCG). Occurrence: 1-37%
